# Supplementary material for: A sustainable strategy for the synthesis of bis-2-iminothiazolidin-4-ones utilizing novel series of asymmetrically substituted bis-thioureas as viable precursors
Source: Royal Society of Chemistry journal article supplement (doi:10.1039/c8ra01253a), 2018-01-01
Supplement: c8ra01253a1.pdf [file c8ra01253a1.pdf]

## Electronic Supporting Information

### A sustainable strategy for the synthesis of bis-2-iminothiazolidin-4-ones utilizing novel series of asymmetrically substituted bis-thioureas as viable precursors

Wael Abdelgayed Ahmed Arafa<sup>\*a,b</sup> and Hamada Mohamed Ibrahim<sup>b</sup>

<sup>a</sup>Chemistry Department, College of Science, Jouf University, P.O. Box 72341, Sakaka, Aljouf, Kingdom of Saudi Arabia

<sup>b</sup>Chemistry Department, Faculty of Science, Fayoum University P.O. Box 63514, Fayoum City, Egypt

E-mail:waa00@fayoum.edu.eg

#### Index

| No. | Content                                     | Page No. |
|-----|---------------------------------------------|----------|
| 1.  | Experimental details                        | S3-S11   |
| 2.  | <sup>1</sup> H NMR of <b>3a</b>             | S12      |
| 3.  | <sup>1</sup> H NMR of <b>3b</b>             | S13      |
| 4.  | <sup>13</sup> C NMR of <b>3b</b>            | S14      |
| 5.  | <sup>1</sup> H NMR of <b>3c</b>             | S15      |
| 6.  | <sup>13</sup> C NMR of <b>3c</b>            | S16      |
| 7.  | <sup>1</sup> H NMR of <b>3d</b>             | S17      |
| 8.  | <sup>13</sup> C NMR of <b>3d</b>            | S18      |
| 9.  | <sup>1</sup> H NMR of <b>5a</b>             | S19      |
| 10. | <sup>1</sup> H NMR of <b>5b</b>             | S20      |
| 11. | <sup>1</sup> H NMR of <b>5c</b>             | S21      |
| 12. | <sup>1</sup> H NMR of <b>6a</b> + <b>7a</b> | S22      |
| 13. | <sup>1</sup> H NMR of <b>6b</b> + <b>7b</b> | S23      |
| 14. | <sup>1</sup> H NMR of <b>6c</b> + <b>7c</b> | S24      |

|     |                                               |     |
|-----|-----------------------------------------------|-----|
| 15. | $^{13}\text{C}$ NMR of <b>6c</b> + <b>7c</b>  | S25 |
| 16. | $^1\text{H}$ NMR of <b>6d</b> + <b>7d</b>     | S26 |
| 17. | $^1\text{H}$ NMR of <b>8a</b>                 | S27 |
| 18. | $^1\text{H}$ NMR of <b>8b</b>                 | S28 |
| 19. | $^1\text{H}$ NMR of <b>9a</b> + <b>10a</b>    | S29 |
| 20. | $^1\text{H}$ NMR of <b>9b</b> + <b>10b</b>    | S30 |
| 21. | $^{13}\text{C}$ NMR of <b>9b</b> + <b>10b</b> | S31 |
| 22. | Green Metrics Calculations                    | S32 |
| 23. | References                                    | S32 |

## Experiments

### General procedure for the synthesis of bis-thioureas (3a–d).

Isothiocyanates (**1a, b**, 0.5 mmol) and diamines (**2a, b**, 1.0 mmol) were mixed in a 25 mL round-bottomed flask. The reaction mixture was sonicated in the water bath (23 °C) of an ultrasonic cleaner, for 5 min as indicated in Table 1. After completion of the reaction (the reaction was monitored by TLC, silica gel; DCM:petroleum ether = 5:2 V/V), the reaction mixture was triturated with 2 mL chilled EtOH, and the precipitate was filtered, affording the crude product, which was purified by recrystallization from EtOH (95–97%).

**1,1'-((1R,4R)-Cyclohexane-1,4-diyl)bis(3-benzylthiourea) (3a)**, colorless solid, m.p. 229–231 °C; <sup>1</sup>H NMR (400 MHz, DMSO-*d*<sub>6</sub>) δ (ppm): 7.65 (b, 2H, 2NH), 7.35–7.21 (m, 12H, 2NH + Ar-H), 4.66 (d, *J* = 5.1, 4H, 2CH<sub>2</sub>), 3.92 (b, 2H, cyclohexyl-H), 1.95–1.93 (m, 4H, cyclohexyl-H), 1.27–1.21 (m, 4H, cyclohexyl-H); <sup>13</sup>C NMR (100 MHz, DMSO-*d*<sub>6</sub>) δ (ppm): 181.4, 139.2, 127.9, 127.4, 126.4, 51.5, 47.0, 30.5; IR (KBr, cm<sup>-1</sup>): 3265, 3221 (NH), 1573 (C=C), 1262 (C=S); MS *m/z* (%): 412 (0.4), 321 (24.2), 248 (12.8), 165 (57.4), 91 (100); Anal. Calcd for C<sub>22</sub>H<sub>28</sub>N<sub>4</sub>S<sub>2</sub>: C, 64.04; H, 6.84; N, 13.58%; Found: C, 64.09; H, 6.79; N, 13.62%.

**1,1'-((1R,4R)-Cyclohexane-1,4-diyl)bis(3-allylthiourea) (3b)**, pale yellow solid, m.p. 330–332 °C; <sup>1</sup>H NMR (400 MHz, DMSO-*d*<sub>6</sub>) δ (ppm): 7.33 (b, 2H, 2NH), 7.27–7.25 (d, 2H, 2NH), 5.90–5.77 (m, 2H, CH<sub>2</sub>=CH), 5.16–5.04 (m, 4H, CH<sub>2</sub>=CH), 4.03 (b, 4H, CH<sub>2</sub>–N), 3.91 (b, 2H, cyclohexyl-H), 1.92–1.90 (m, 4H, cyclohexyl-H), 1.25–1.19 (m, 4H, cyclohexyl-H); <sup>13</sup>C NMR (100 MHz, DMSO-*d*<sub>6</sub>) δ (ppm): 181.1, 135.1, 115.3, 51.4, 45.7, 30.8; IR (KBr, cm<sup>-1</sup>): 3237, 3211 (NH), 1569 (C=C), 1260 (C=S); MS *m/z* (%): 312 (0.1),

300 (0.2), 256 (40.4), 198 (26.9), 117 (33.4), 96 (49.7), 58 (100); Anal. Calcd for C<sub>14</sub>H<sub>24</sub>N<sub>4</sub>S<sub>2</sub>: C, 53.81; H, 7.74; N, 17.93%; Found: C, 53.77; H, 7.80; N, 17.85%.

**1,1'-(1,4-Phenylenebis(methylene))bis(3-benzylthiourea) (3c)**, light yellow solid, m.p. 166–167 °C; <sup>1</sup>H NMR (400 MHz, DMSO-*d*<sub>6</sub>) δ (ppm): 7.89 (b, 4H, 4NH), 7.35–7.23 (m, 14H, Ar-H), 4.66 (b, 8H, 4CH<sub>2</sub>); <sup>13</sup>C NMR (100 MHz, DMSO-*d*<sub>6</sub>) δ (ppm): 181.5, 139.2, 137.8, 128.2, 127.3, 127.2, 126.8, 47.0, 46.8; IR (KBr, cm<sup>-1</sup>): 3271, 3232 (NH), 1562 (C=C), 1250 (C=S); MS *m/z* (%): 434 (0.6), 343 (21.6), 252 (58.3), 104 (23.5), 91 (100); Anal. Calcd for C<sub>24</sub>H<sub>26</sub>N<sub>4</sub>S<sub>2</sub>: C, 66.33; H, 6.03; N, 12.89%; Found: C, 66.42; H, 5.95; N, 12.79%.

**1,1'-(1,4-Phenylenebis(methylene))bis(3-allylthiourea) (3d)**, yellow solid, m.p. 176–178 °C; <sup>1</sup>H NMR (400 MHz, DMSO-*d*<sub>6</sub>) δ (ppm): 7.80 (b, 2H, 2NH), 7.55 (b, 2H, 2NH), 7.23 (s, 4H, Ar-H), 5.89–5.80 (m, 2H, CH<sub>2</sub>=CH), 5.17–5.05 (m, 4H, CH<sub>2</sub>=CH), 4.63 (d, *J* = 5.0 Hz, 4H, 2CH<sub>2</sub>), 4.06 (b, 4H, CH<sub>2</sub>-N); <sup>13</sup>C NMR (100 MHz, DMSO-*d*<sub>6</sub>) δ (ppm): 181.2, 137.8, 135.0, 127.1, 115.3, 46.7, 45.8; IR (KBr, cm<sup>-1</sup>): 3267, 3224 (NH), 1562 (C=C), 1259 (C=S); MS *m/z* (%): 334(0.3), 279 (1.6), 262 (31.4), 99 (43.6), 91 (88.7), 56 (100); Anal. Calcd for C<sub>16</sub>H<sub>22</sub>N<sub>4</sub>S<sub>2</sub>: C, 57.45; H, 6.63; N, 16.75%; Found: C, 57.51; H, 6.57; N, 16.83%.

## General methods for the synthesis of derivatives 5–7.

### Method A:

To a solution of 1 mmol of bis-thioureas **3a–d** and 10 mL of deionized water in a 50 mL round-bottom flask was added dropwise at room temperature 2 mmol of dialkyl acetylenedicarboxylate (DAADs, **4a, b**) with continuous stirring. After the complete addition of DAADs, the reaction mixture was sonicated for 10 min (TLC, DCM:MeOH = 9:1 V/V); during the reaction, a solid appears in the solution. After completion of the

reaction, excess solvent was removed by filtration and the residue recrystallized from ethanol, affording the desired product as colorless to light yellow crystals.

## Method B

Isothiocyanates (**1a, b**, 0.5 mmol) were added dropwisely to diamines (**2a, b**, 1.0 mmol) under ultrasonic irradiation for 5 min. To the resulted residue, 10 mL of water was added followed by dropwisely addition of 2 mmol of dialkyl acetylenedicarboxylate (DAADs, **4a, b**) at room temperature. After the complete addition of DAADs, the reaction mixture was sonicated for 10 min (TLC, DCM:MeOH = 9:1 V/V); during the reaction, a solid appears in the solution. After completion of the reaction, excess solvent was removed by filtration and the residue recrystallized from ethanol, affording the desired product as colorless to light yellow crystals (88–92%).

**Dimethyl 2,2'-((2Z,2'Z)-((1R,4R)-cyclohexane-1,4-diyl)bis(2-(benzylimino)-4-oxothiazolidin-3-yl-5-ylidene))(2Z,2'Z)-diacetate (5a)**, colorless solid, m.p. 193–195 °C; <sup>1</sup>H NMR (400 MHz, DMSO-*d*<sub>6</sub>) δ (ppm): 7.33–7.28 (m, 10H, Ar-H), 6.77 (s, 2H, =CH), 4.92 (s, 4H, 2CH<sub>2</sub>), 3.77 (s, 8H, cyclohexyl-H + 2OCH<sub>3</sub>), 1.81–1.79 (m, 4H, cyclohexyl-H), 1.56 (b, 4H, cyclohexyl-H); <sup>13</sup>C NMR (100 MHz, DMSO-*d*<sub>6</sub>) δ (ppm): 166.2, 165.7, 157.4, 140.4, 139.1, 130.7, 128.0, 127.5, 126.4, 52.1, 52.0, 47.2, 30.7; IR (KBr, cm<sup>-1</sup>): 1716 (C=O), 1689 (C=O), 1651 (C=N), 1624 (C=C); MS *m/z* (%): 632 (2.8), 601 (1.2), 514 (20.6), 298 (14.7), 216 (51.2), 91 (100); Anal. Calcd for C<sub>32</sub>H<sub>32</sub>N<sub>4</sub>O<sub>6</sub>S<sub>2</sub>: C, 60.74; H, 5.10; N, 8.85%; Found: C, 60.65; H, 5.19; N, 8.80%.

**Diethyl 2,2'-((2Z,2'Z)-((1R,4R)-cyclohexane-1,4-diyl)bis(2-(benzylimino)-4-oxothiazolidin-3-yl-5-ylidene))(2Z,2'Z)-diacetate (5b)**, light yellow solid, m.p. 183–185 °C; <sup>1</sup>H NMR (400 MHz, DMSO-*d*<sub>6</sub>) δ (ppm): 7.33–7.26 (m, 10H, Ar-H), 6.74 (s, 2H, =CH), 4.92 (s, 4H, 2CH<sub>2</sub>), 4.24 (q, *J* = 7.12 Hz, 4H, 2OCH<sub>2</sub>), 3.37 (s, 2H, cyclohexyl-H), 1.81–1.79 (m, 4H, cyclohexyl-H), 1.57–1.55 (m, 4H, cyclohexyl-H) 1.25 (t, *J* = 7.12 Hz,

6H, 2CH<sub>3</sub>); <sup>13</sup>C NMR (100 MHz, DMSO-*d*<sub>6</sub>) δ (ppm): 166.0, 165.9, 157.3, 139.4, 138.0, 133.7, 128.0, 127.4, 126.3, 62.2, 52.4, 47.8, 30.4, 14.3; IR (KBr, cm<sup>-1</sup>): 1717 (C=O), 1688 (C=O), 1650 (C=N), 1622 (C=C); MS *m/z* (%): 660 (0.2), 587 (1.9), 494 (29.2), 298 (27.5), 126 (85.1), 106 (100); Anal. Calcd for C<sub>34</sub>H<sub>36</sub>N<sub>4</sub>O<sub>6</sub>S<sub>2</sub>: C, 61.80; H, 5.49; N, 8.48%; Found C, 61.89; H, 5.42; N, 8.54%.

**Dimethyl**                    **2,2'-((2Z,2'Z)-((1R,4R)-cyclohexane-1,4-diyl)bis(2-(allylimino)-4-oxothiazolidin-3-yl-5-ylidene))(2Z,2'Z)-diacetate (5c)**, light yellow solid, m.p. 197–198 °C; <sup>1</sup>H NMR (400 MHz, DMSO-*d*<sub>6</sub>) δ (ppm): 6.77 (s, 2H, =CH), 5.99–5.87 (m, 2H, CH<sub>2</sub>=CH), 5.18–5.05 (m, 4H, CH<sub>2</sub>=CH), 4.34–4.32 (m, 4H, CH<sub>2</sub>-N), 4.15 (b, 2H, cyclohexyl-H), 3.79 (s, 6H, 2OCH<sub>3</sub>), 1.89–1.45 (m, 8H, cyclohexyl-H); <sup>13</sup>C NMR (100 MHz, DMSO-*d*<sub>6</sub>) δ (ppm): 166.4, 165.9, 158.6, 139.8, 135.2, 131.9, 115.5, 52.1, 52.0, 45.8, 30.9; IR (KBr, cm<sup>-1</sup>): 1719 (C=O), 1689 (C=O), 1656 (C=N), 1620 (C=C); MS *m/z* (%): 501 (M-CH<sub>3</sub>O, 1.6), 414 (2.6), 374 (3.7), 263 (31.7), 112 (54.8), 69 (100); Anal. Calcd for C<sub>24</sub>H<sub>28</sub>N<sub>4</sub>O<sub>6</sub>S<sub>2</sub>: C, 54.12; H, 5.30; N, 10.52%; Found C, 54.06; H, 5.38; N, 10.59%.

**Diethyl**                    **2,2'-((2Z,2'Z)-((1R,4R)-cyclohexane-1,4-diyl)bis(2-(allylimino)-4-oxothiazolidin-3-yl-5-ylidene))(2Z,2'Z)-diacetate (5d)**, light yellow solid, m.p. 203–205 °C; <sup>1</sup>H NMR (400 MHz, DMSO-*d*<sub>6</sub>) δ (ppm): 6.79 (s, 2H, =CH), 5.97–5.89 (m, 2H, CH<sub>2</sub>=CH), 5.16–5.04 (m, 4H, CH<sub>2</sub>=CH), 4.35–4.33 (m, 4H, CH<sub>2</sub>-N), 4.13 (b, 2H, cyclohexyl-H), 4.27 (q, *J* = 7.1 Hz, 4H, 2CH<sub>2</sub>), 1.88–1.46 (m, 8H, cyclohexyl-H) 1.33 (t, *J* = 7.2 Hz, 6H, 2CH<sub>3</sub>); <sup>13</sup>C NMR (100 MHz, DMSO-*d*<sub>6</sub>) δ (ppm): 166.7, 165.8, 158.3, 138.6, 135.3, 133.6, 115.4, 62.1, 51.8, 45.8, 31.0, 14.3; IR (KBr, cm<sup>-1</sup>): 1720 (C=O), 1686 (C=O), 1651 (C=N), 1617 (C=C); MS *m/z* (%): 560 (0.8), 454 (0.5), 381 (1.6), 283 (0.9), 186 (23.5), 101 (85.7), 88 (100); Anal. Calcd for C<sub>26</sub>H<sub>32</sub>N<sub>4</sub>O<sub>6</sub>S<sub>2</sub>: C, 55.70; H, 5.75; N, 9.99%; Found C, 55.63; H, 5.81; N, 10.14%.

**Dimethyl 2,2'-((2E,2'E)-((1,4-phenylenebis(methylene))bis(azanylylidene))bis(3-benzyl-4-oxothiazolidine-2,5-diylidene))(2Z,2'Z)-diacetate (6a) + methyl (Z)-2-((Z)-2-(benzylimino)-3-(4-(((2E,5Z)-2-(benzylimino)-5-(2-methoxy-2-oxoethylidene)-4-oxothiazolidin-3-yl)methyl)benzyl)-4-oxothiazolidin-5-ylidene)acetate (7a)**, light yellow solid, m.p. 195–199 °C; (Regioisomeric Mixture); <sup>1</sup>H NMR (400 MHz, DMSO-*d*<sub>6</sub>) δ (ppm): 7.29–7.18 (m, 14H, Ar-H), 6.80 (s, 1H, =CH), 6.79 (s, 1H, =CH), 4.98–4.95 (m, 4H, CH<sub>2</sub>), 4.64–4.61 (m, 4H, CH<sub>2</sub>), 3.78 (s, 6H, 2OCH<sub>3</sub>); <sup>13</sup>C NMR (100 MHz, DMSO-*d*<sub>6</sub>) δ (ppm): 166.8, 166.1, 158.5, 140.2, 139.2, 137.9, 137.8, 131.9, 127.9, 127.8, 127.4, 127.3, 127.2, 126.4, 126.3, 52.5, 47.4, 47.3, 47.0, 46.9; IR (KBr, cm<sup>-1</sup>): 1716 (C=O), 1697 (C=O), 1647 (C=N), 1608 (C=C); MS *m/z* (%): 654 (1.6), 623 (0.8), 552 (29.4), 479 (47.1), 350 (37.2), 295 (23.7), 91 (74.8), 104 (100); Anal. Calcd for C<sub>34</sub>H<sub>30</sub>N<sub>4</sub>O<sub>6</sub>S<sub>2</sub>: C, 62.37; H, 4.62; N, 8.56%; Found C, 62.43; H, 4.56; N, 8.62%.

**Diethyl 2,2'-((2E,2'E)-((1,4-phenylenebis(methylene))bis(azanylylidene))bis(3-benzyl-4-oxothiazolidine-2,5-diylidene))(2Z,2'Z)-diacetate (6b) + ethyl (Z)-2-((Z)-2-(benzylimino)-3-(4-(((2E,5Z)-2-(benzylimino)-5-(2-ethoxy-2-oxoethylidene)-4-oxothiazolidin-3-yl)methyl)benzyl)-4-oxothiazolidin-5-ylidene)acetate (7b)**, colorless solid, m.p. 144–146 °C; (Regioisomeric Mixture); <sup>1</sup>H NMR (400 MHz, DMSO-*d*<sub>6</sub>) δ (ppm): 7.31–7.18 (m, 14H, Ar-H), 6.78 (s, 1H, =CH), 6.77 (s, 1H, =CH), 4.98–4.85 (m, 4H, CH<sub>2</sub>), 4.65–4.62 (m, 4H, CH<sub>2</sub>), 4.24 (q, *J* = 7.08 Hz, 4H, OCH<sub>2</sub>CH<sub>3</sub>), 1.26 (t, *J* = 7.08 Hz, 6H, OCH<sub>2</sub>CH<sub>3</sub>); <sup>13</sup>C NMR (100 MHz, DMSO-*d*<sub>6</sub>) δ (ppm): 166.9, 166.5, 159.8, 139.3, 139.0, 137.5, 134.1, 128.0, 127.9, 127.8, 127.6, 127.5, 126.4, 126.3, 61.7, 47.9, 44.7, 14.1; IR (KBr, cm<sup>-1</sup>): 1720 (C=O), 1695 (C=O), 1644 (C=N), 1611 (C=C); MS *m/z* (%): 683 (M + H, 0.7), 513 (0.5), 309 (0.2), 205 (58.2), 106 (89.4), 91 (100); Anal. Calcd for C<sub>36</sub>H<sub>34</sub>N<sub>4</sub>O<sub>6</sub>S<sub>2</sub>: C, 63.33; H, 5.02; N, 8.21%; Found C, 63.40; H, 4.97; N, 8.14%.

**Dimethyl 2,2'-((2E,2'E)-((1,4-phenylenebis(methylene))bis(azanylylidene))bis(3-allyl-4-oxothiazolidine-2,5-diylidene))(2Z,2'Z)-diacetate (6c) + methyl (Z)-2-((Z)-2-**

**(allylimino)-3-(4-(((2*E*,5*Z*)-2-(allylimino)-5-(2-methoxy-2-oxoethylidene)-4-oxothiazolidin-3-yl)methyl)benzyl)-4-oxothiazolidin-5-ylidene)acetate (7c)**, colorless solid, m.p. 185–187 °C; (Regioisomeric Mixture); <sup>1</sup>H NMR (400 MHz, DMSO-*d*<sub>6</sub>) δ (ppm): 7.30–7.25 (m, 4H, Ar-H), 6.78 (s, 1H, =CH), 6.77 (s, 1H, =CH), 5.99–5.78 (m, 2H, CH=CH<sub>2</sub>), 5.17–5.10 (m, 4H, CH<sub>2</sub>=CH), 4.94–4.92 (d, 2H, Ar-CH<sub>2</sub>), 4.64–4.61 (d, 2H, Ar-CH<sub>2</sub>), 4.41–4.39 (m, 2H, N-CH<sub>2</sub>CH=CH<sub>2</sub>), 4.08–4.06 (m, 2H, N-CH<sub>2</sub>CH=CH<sub>2</sub>), 3.78 (d, 6H, 2OCH<sub>3</sub>); <sup>13</sup>C NMR (100 MHz, DMSO-*d*<sub>6</sub>) δ (ppm): 168.0, 166.1, 158.4, 138.0, 137.5, 135.5, 131.3, 127.8, 127.7, 127.5, 127.4, 120.6, 117.2, 115.6, 115.1, 114.9, 53.7, 52.5, 44.4; IR (KBr, cm<sup>-1</sup>): 1712 (C=O), 1697 (C=O), 1647 (C=N), 1604 (C=C); MS *m/z* (%): 554 (0.3), 413 (2.8), 245 (46.8), 92 (95.4), 90 (100); Anal. Calcd for C<sub>26</sub>H<sub>26</sub>N<sub>4</sub>O<sub>6</sub>S<sub>2</sub>: C, 56.30; H, 4.73; N, 10.10%; Found C, 56.39; H, 4.68; N, 10.21%.

**Diethyl 2,2'-((2*E*,2'*E*)-((1,4-phenylenebis(methylene))bis(azanylylidene))bis(3-allyl-4-oxothiazolidine-2,5-diylidene))(2*Z*,2'*Z*)-diacetate (6d) + ethyl (*Z*)-2-((*Z*)-2-(allylimino)-3-(4-(((2*E*,5*Z*)-2-(allylimino)-5-(2-ethoxy-2-oxoethylidene)-4-oxothiazolidin-3-yl)methyl)benzyl)-4-oxothiazolidin-5-ylidene)acetate (7d)**, light yellow solid, m.p. 185–187 °C; (Regioisomeric Mixture); <sup>1</sup>H NMR (400 MHz, DMSO-*d*<sub>6</sub>) δ (ppm): 7.29–7.24 (m, 4H, Ar-H), 6.75 (s, 1H, =CH), 6.74 (s, 1H, =CH), 5.99–5.79 (m, 2H, CH=CH<sub>2</sub>), 5.16–5.09 (m, 4H, CH<sub>2</sub>=CH), 4.94–4.91 (d, 2H, Ar-CH<sub>2</sub>), 4.63–4.60 (d, 2H, Ar-CH<sub>2</sub>), 4.40–4.37 (m, 2H, N-CH<sub>2</sub>CH=CH<sub>2</sub>), 4.27–4.20 (m, 4H, OCH<sub>2</sub>CH<sub>3</sub>), 4.07–4.05 (m, 2H, N-CH<sub>2</sub>CH=CH<sub>2</sub>), 1.28–1.23 (m, 6H, OCH<sub>2</sub>CH<sub>3</sub>); <sup>13</sup>C NMR (100 MHz, DMSO-*d*<sub>6</sub>) δ (ppm): 166.8, 166.1, 159.8, 138.6, 137.7, 135.7, 135.5, 132.6, 127.6, 127.5, 115.8, 115.6, 61.5, 47.9, 45.6, 45.4, 14.2; IR (KBr, cm<sup>-1</sup>): 1717 (C=O), 1689 (C=O), 1655 (C=N), 1602 (C=C); MS *m/z* (%): 553 (M – C<sub>2</sub>H<sub>5</sub>O, 1.3), 412 (4.9), 245 (67.2), 90 (100); Anal. Calcd for C<sub>28</sub>H<sub>30</sub>N<sub>4</sub>O<sub>6</sub>S<sub>2</sub>: C, 57.72; H, 5.19; N, 9.62%; Found: C, 57.79; H, 5.08; N, 9.57%.

**General procedures for the preparation of compounds 8–10.**



**Method A: from ethyl chloroacetate:**

The appropriate bis-thioureas **3a–d** (1 mmol), ethyl chloroacetate (2 mmol) and sodium acetate (0.16 g, 2 mmol) were irradiated under ultrasonic in ethanol (25 mL) at 90 °C for 30 min (TLC, DCM:MeOH = 9:1 V/V). The resulting solid was filtered, dried and recrystallized from ethanol containing few drops of dioxane to afford the corresponding bis-thiazolidine derivatives **8–10**.

**Method B: from chloroacetyl chloride:**

To bis-thioureas **3a–d** (1 mmol) in a 10 mL round bottom flask was added chloroacetyl chloride (1.2 mmol) drop wise under ultrasonic irradiation. After complete addition of chloroacetylchloride, acetonitrile (5 mL) was added to the reaction mixture and stirred was continued for 5 min (TLC, DCM:MeOH = 9:1 V/V). The resulting solid was filtered, dried and recrystallized from ethanol containing few drops of dioxane to afford the corresponding bis-thiazolidine derivatives **8–10** (93-88%).

**(2Z,2'Z)-3,3'-((1R,4R)-Cyclohexane-1,4-diyl)bis(2-(benzylimino)thiazolidin-4-one)**

**(8a)**, light yellow solid, m.p. 219–221°C; <sup>1</sup>H NMR (400 MHz, DMSO-*d*<sub>6</sub>) δ (ppm): 7.33–7.22 (m, 10H, Ar-H), 4.77 (s, 4H, CH<sub>2</sub>, CH<sub>2</sub>Ph), 4.04 (s, 4H, thiazole-CH<sub>2</sub>), 3.20–3.16 (m, 2H, chclohexane), 1.76–1.74 (m, 4H, chclohexane), 1.45–1.39 (m, 4H, chclohexane); <sup>13</sup>C NMR (100 MHz, DMSO-*d*<sub>6</sub>) δ (ppm): 171.3, 153.1, 138.9, 128.1, 127.5, 126.9, 53.9, 52.0, 32.1, 30.8; IR (KBr, cm<sup>-1</sup>): 1716 (C=O), 1639 (C=N), 1581 (C=C); MS *m/z* (%): 492 (31.6), 419 (34.9), 287 (2.9), 205 (34.8), 106 (69.3), 81 (100); Anal. Calcd for C<sub>26</sub>H<sub>28</sub>N<sub>4</sub>O<sub>2</sub>S<sub>2</sub>: C, 63.39; H, 5.73; N, 11.37%; Found: C, 63.43; H, 5.69; N, 11.42%.

**(2Z,2'Z)-3,3'-((1R,4R)-Cyclohexane-1,4-diyl)bis(2-(allylimino)thiazolidin-4-one) (8b)**

light yellow solid, m.p. 157–159 °C; <sup>1</sup>H NMR (400 MHz, DMSO-*d*<sub>6</sub>) δ (ppm): 5.82–5.73 (m, 2H, CH<sub>2</sub>CH=CH<sub>2</sub>), 5.11–5.05 (m, 4H, CH<sub>2</sub>CH=CH<sub>2</sub>), 4.19 (d, *J* = 3.7 Hz, 4H, CH<sub>2</sub>CH=CH<sub>2</sub>), 4.02 (s, 4H, thiazole-CH<sub>2</sub>), 3.18–3.13 (m, 2H, chclohexane), 1.78–1.76

(m, 4H, chclohexane), 1.46–1.40 (m, 4H, chclohexane);  $^{13}\text{C}$  NMR (100 MHz, DMSO- $d_6$ )  $\delta$  (ppm): 171.3, 153.0, 131.7, 116.7, 54.0, 43.9, 32.1, 30.9; IR (KBr,  $\text{cm}^{-1}$ ): 1720 (C=O), 1635 (C=N), 1596 (C=C); MS  $m/z$  (%): 392 (12.6), 284 (25.8), 184 (73.2), 101 (73.9), 74 (100); Anal. Calcd for  $\text{C}_{18}\text{H}_{24}\text{N}_4\text{O}_2\text{S}_2$ : C, 55.08; H, 6.16; N, 14.27%; Found: C, 54.96; H, 6.22; N, 14.35%.

**(2Z,2'Z)-2,2'-((1,4-Phenylenebis(methylene))bis(azanylylidene))bis(3-benzylthiazolidin-4-one) (9a) + (2Z,2'Z)-3,3'-(1,4-phenylenebis(methylene))bis(2-(benzylimino)thiazolidin-4-one) (10a)**, light yellow solid, m.p. 165–167 °C; (Regioisomeric Mixture);  $^1\text{H}$  NMR (400 MHz, DMSO- $d_6$ )  $\delta$  (ppm): 7.31–7.13 (m, 14H, ArH), 4.84–4.82 (m, 4H,  $\text{CH}_2$ ), 4.45–4.42 (m, 4H,  $\text{CH}_2$ ), 4.12–4.10 (m, 4H, thiazole- $\text{CH}_2$ );  $^{13}\text{C}$  NMR (100 MHz, DMSO- $d_6$ )  $\delta$  (ppm): 171.2, 153.1, 139.8, 137.9, 128.0, 127.7, 127.6, 126.5, 126.4, 54.2, 54.1, 49.1, 32.3; IR (KBr,  $\text{cm}^{-1}$ ): 1717 (C=O), 1630 (C=N), 1604 (C=C); MS  $m/z$  (%): 515 (M + H, 1.3), 514 (12.8), 324 (17.9), 233 (85.2), 205 (23.8), 134 (27.9), 104 (11.5), 91 (100); Anal. Calcd for  $\text{C}_{28}\text{H}_{26}\text{N}_4\text{O}_2\text{S}_2$ : C, 65.35; H, 5.09; N, 10.89%; Found: C, 65.41; H, 4.98; N, 10.79%.

**(2Z,2'Z)-2,2'-((1,4-phenylenebis(methylene))bis(azanylylidene))bis(3-allylthiazolidin-4-one) (9b) + (2Z,2'Z)-3,3'-(1,4-phenylenebis(methylene))bis(2-(allylimino)thiazolidin-4-one) (10b)**, yellow solid, m.p. 124–126 °C; (Regioisomeric Mixture);  $^1\text{H}$  NMR (400 MHz, DMSO- $d_6$ )  $\delta$  (ppm): 7.25 (m, 4H, Ar-H), 5.80–5.71 (m, 2H,  $\text{CH}_2\text{CH}=\text{CH}_2$ ), 5.15–5.10 (m, 4H,  $\text{CH}_2\text{CH}=\text{CH}_2$ ), 4.43–4.42 (m, 4H,  $\text{CH}_2$ ), 4.26–4.25 (m, 4H,  $\text{CH}_2\text{CH}=\text{CH}_2$ ), 4.07 (s, 4H, thiazole- $\text{CH}_2$ );  $^{13}\text{C}$  NMR (100 MHz, DMSO- $d_6$ )  $\delta$  (ppm): 171.2, 153.0, 137.7, 131.6, 127.4, 127.0, 120.4, 116.6, 114.9, 54.1, 54.0, 43.9, 32.2; IR (KBr,  $\text{cm}^{-1}$ ): 1717 (C=O), 1634 (C=N), 1591 (C=C); MS  $m/z$  (%): 414 (1.2), 332 (23.8), 304 (11.8), 205 (46.2), 105 (87.9), 91 (100); Anal. Calcd for  $\text{C}_{20}\text{H}_{22}\text{N}_4\text{O}_2\text{S}_2$ : C, 57.95; H, 5.35; N, 13.52%; Found: C, 58.04; H, 5.29; N, 13.48%.

## Synthesis of derivatives **11a, b**

A one-pot three component mixture of the appropriate bis-thioureas **3a, b** (1 mmol), ethyl chloroacetate (2 mmol), 4-chlorobenzaldehyde (2 mmol) and sodium acetate (5 mmol) were mixed in ethanol (15 mL). The reaction mixture was sonicated at 90 °C for 30 min (TLC, DCM:MeOH = 8:2 V/V). The resulting residue was filtered and recrystallized from dioxane to afford the corresponding bis-thiazolidine derivatives **11a, b** in 86–90% yield.

**(2Z,2'Z,5'E)-3,3'-((1R,4R)-Cyclohexane-1,4-diyl)bis(2-(benzylimino)-5-((E)-4-chlorobenzylidene)thiazolidin-4-one) (11a)**, yellow solid, m.p. 322–325 °C; <sup>1</sup>H NMR (400 MHz, DMSO-*d*<sub>6</sub>) δ (ppm): 7.82 (s, 1H, CH=C), 7.71–7.63 (m, 8H, Ar-H), 7.39–7.26 (m, 10H, Ar-H), 4.74 (s, 4H, CH<sub>2</sub>, CH<sub>2</sub>Ph), 3.23–3.19 (m, 2H, chclohexane), 1.77–1.75 (m, 4H, chclohexane), 1.44–1.40 (m, 4H, chclohexane); IR (KBr, cm<sup>-1</sup>): 1719 (C=O), 1637 (C=N), 1608 (C=C); MS *m/z* (%): 625 (M – C<sub>6</sub>H<sub>4</sub>Cl, 1.3), 521 (12.7), 306 (1.9), 125 (100); Anal. Calcd for C<sub>40</sub>H<sub>34</sub>Cl<sub>2</sub>N<sub>4</sub>O<sub>2</sub>S<sub>2</sub>: C, 65.12; H, 4.65; N, 7.59%; Found: C, 65.07; H, 4.70; N, 7.49%.

**(2Z,2'Z,5'E)-3,3'-((1R,4R)-Cyclohexane-1,4-diyl)bis(2-(allylimino)-5-((E)-4-chlorobenzylidene)thiazolidin-4-one) (11b)**, yellow solid, m.p. 302–304 °C; <sup>1</sup>H NMR (400 MHz, DMSO-*d*<sub>6</sub>) δ (ppm): 7.80 (s, 1H, CH=C), 7.75–7.69 (m, 8H, Ar-H), 5.80–5.72 (m, 2H, CH<sub>2</sub>CH=CH<sub>2</sub>), 5.12–5.07 (m, 4H, CH<sub>2</sub>CH=CH<sub>2</sub>), 4.21 (m, 4H, CH<sub>2</sub>CH=CH<sub>2</sub>), 3.17–3.14 (m, 2H, chclohexane), 1.78–1.75 (m, 4H, chclohexane), 1.47–1.41 (m, 4H, chclohexane); IR (KBr, cm<sup>-1</sup>): 1712 (C=O), 1641 (C=N), 1611 (C=C); MS *m/z* (%): 636 (0.9), 512 (26.2), 374 (12.6), 125 (100); Anal. Calcd for C<sub>32</sub>H<sub>30</sub>Cl<sub>2</sub>N<sub>4</sub>O<sub>2</sub>S<sub>2</sub>: C, 60.28; H, 4.74; N, 8.79%; Found: C, 60.32; H, 4.69; N, 8.68%.

Wae1AbdE1Hameed-P81-DMSO-H1

Archive directory: /export/home/vnmr1/vnmrsys/data  
Sample directory: DD5mm\_test\_12Mar2014-21:34:40  
File: PROTON

Pulse Sequence: s2pu1  
Solvent: DMSO  
Temp. 35.0 C / 308.1 K  
Mercury-300BB "NMR300"

Relax. delay 1.000 sec  
Pulse 45.0 degrees  
Acq. time 4.853 sec  
Width 6600.7 Hz  
28 repetitions  
OBSERVE H1, 300.0687871 MHz  
DATA PROCESSING  
F1 size 65536  
Total time 43 min, 34 sec  
Date: Nov 13 2017

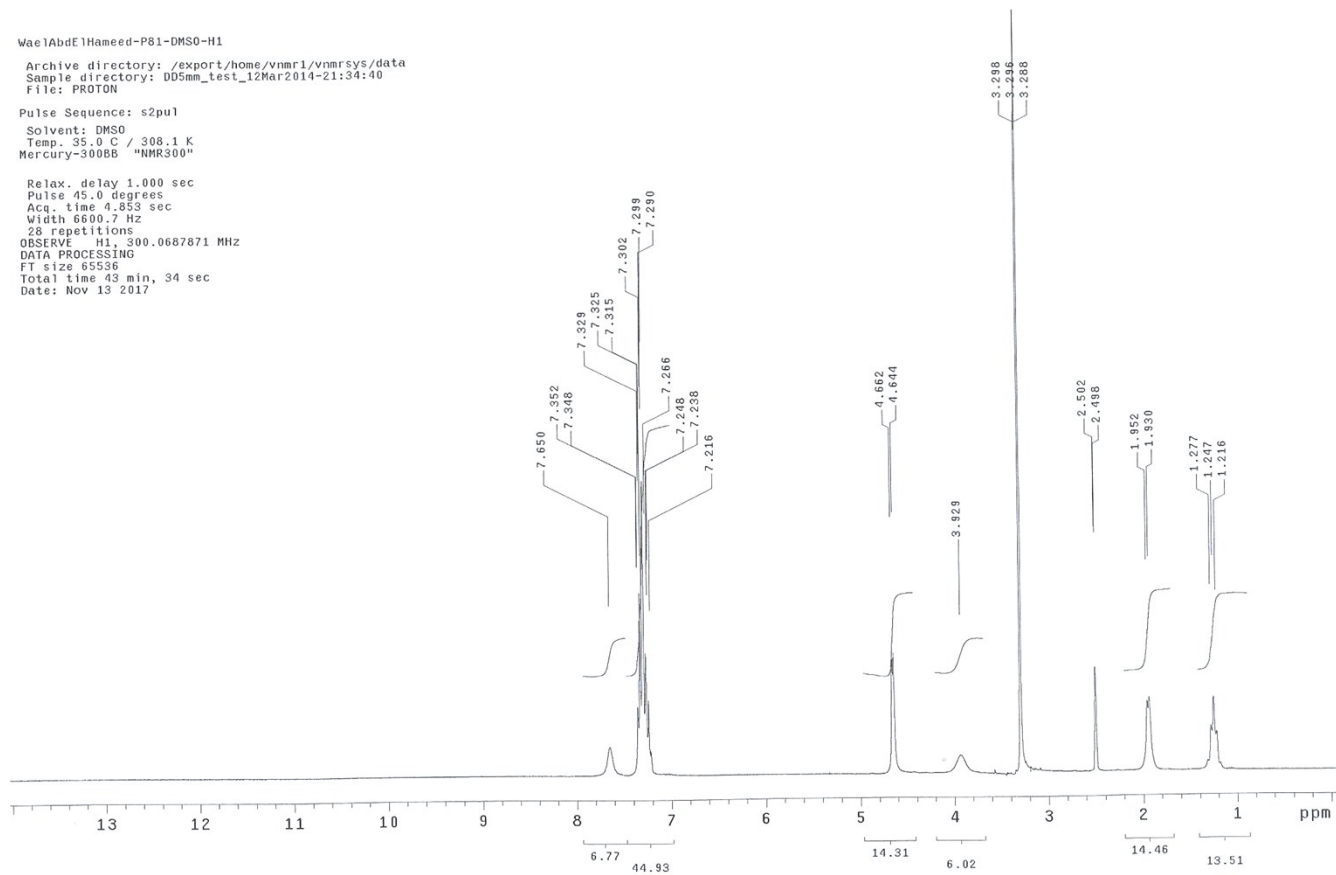

<sup>1</sup>H NMR of 3a

Archive directory: /export/home/vnmr1/vnmrsys/data  
Sample directory: DD5mm\_test\_12Mar2014-21:34:40  
File: PROTON

Pulse Sequence: s2pu1  
Solvent: DMSO  
Temp. 30.0 C / 303.1 K  
Mercury-300BB "NMR300"

Relax. delay 1.000 sec  
Pulse 25.0 degrees  
Acq. time 4.853 sec  
Width 6600.7 Hz  
30 repetitions  
OBSERVE H1, 300.0687871 MHz  
DATA PROCESSING  
FI size 65536  
Total time 43 min, 34 sec  
Date: Nov 12 2017

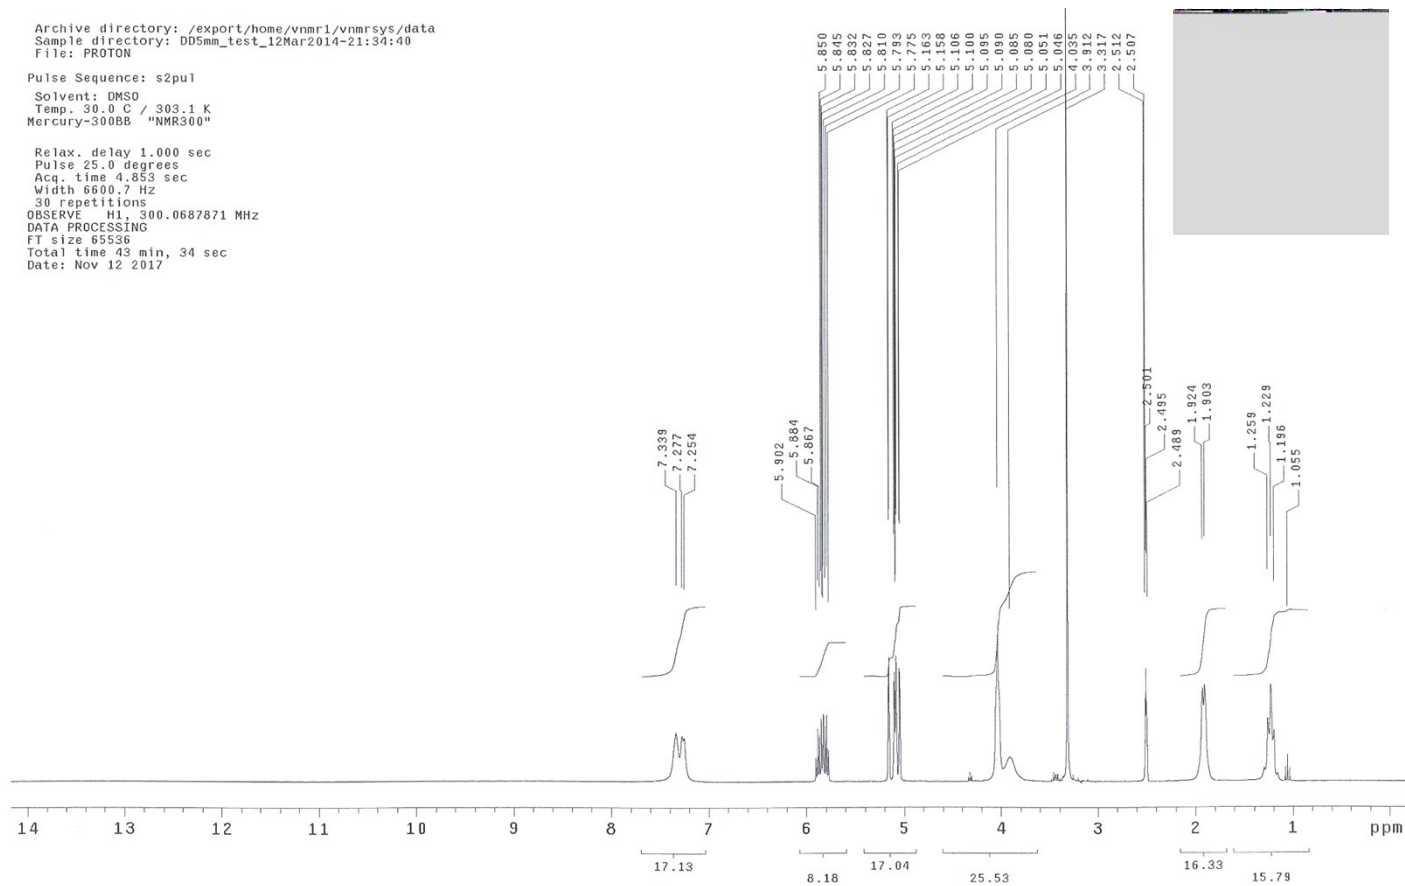

$^1\text{H}$  NMR of **3b**

Vae1AbdE1Hameed-108P-DMSO-C13

Archive directory: /export/home/vnmr1/vnmrsys/data  
Sample directory: DD5mm\_test\_12Mar2014-21:34:40  
File: PROTON

Pulse Sequence: s2pu1  
Solvent: DMSO  
Temp. 30.0 C / 303.1 K  
Mercury-300BB "NMR300"

Pulse 45.0 degrees  
Acq. time 1.815 sec  
Width 18761.7 Hz  
1808 repetitions  
OBSERVE C13, 75.4523945 MHz  
DECOUPLE H1, 300.0702830 MHz  
Power 33 dB  
continuously on  
WALTZ-16 modulated  
DATA PROCESSING  
Line broadening 1.0 Hz  
FT size 131072  
Total time 32 hr, 58 min, 37 sec  
Date: Dec 9 2017

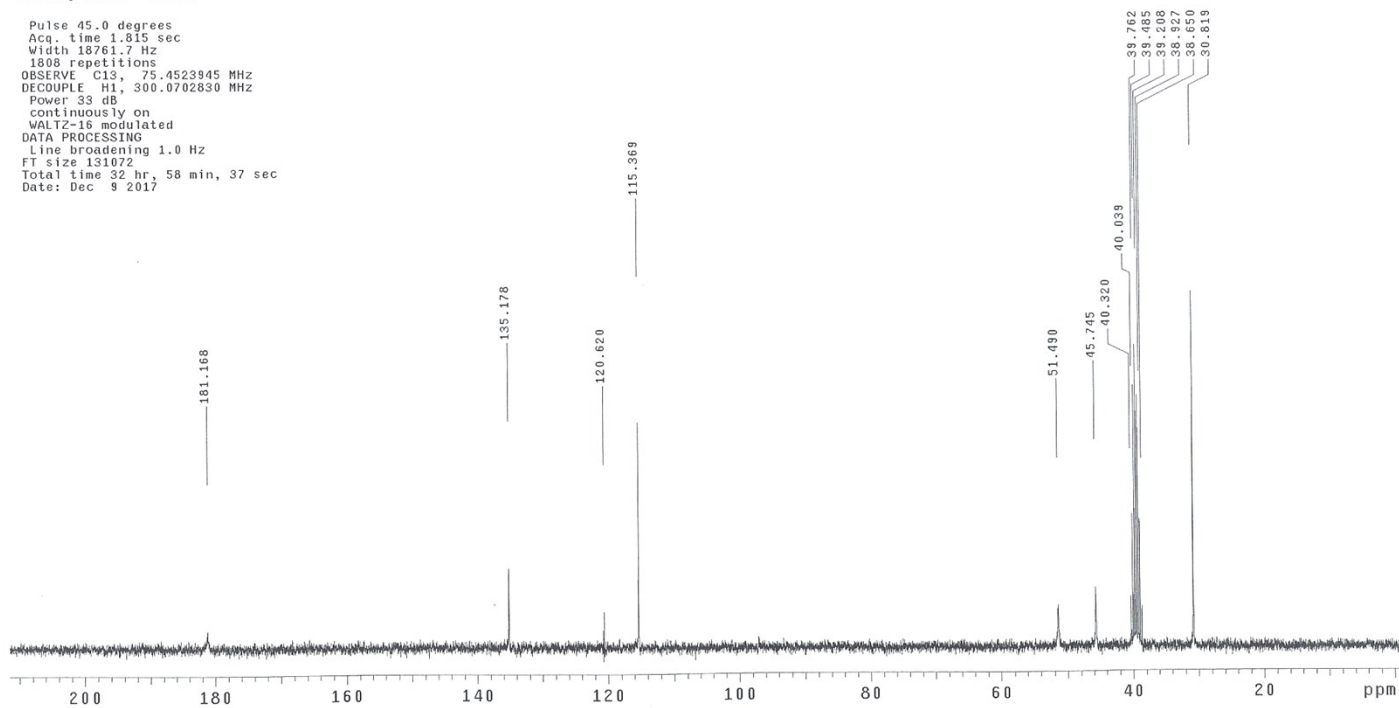

$^{13}\text{C}$  NMR of **3b**

Vae1AbdE1Hameed-106P-DMSO-H1

Archive directory: /export/home/vnmr1/vnmrsys/data  
Sample directory: DD5mm\_test\_12Mar2014-21:34:40  
File: PROTON

Pulse Sequence: s2pu1  
Solvent: DMSO  
Temp. 35.0 C / 308.1 K  
Mercury-300BB "NMR300"

Relax. delay 1.000 sec  
Pulse 45.0 degrees  
Acq. time 4.653 sec  
Width 6600.7 Hz  
39 repetitions  
OBSERVE H1, 300.0687871 MHz  
DATA PROCESSING  
FT size 65536  
Total time 43 min, 34 sec  
Date: Nov 13 2017

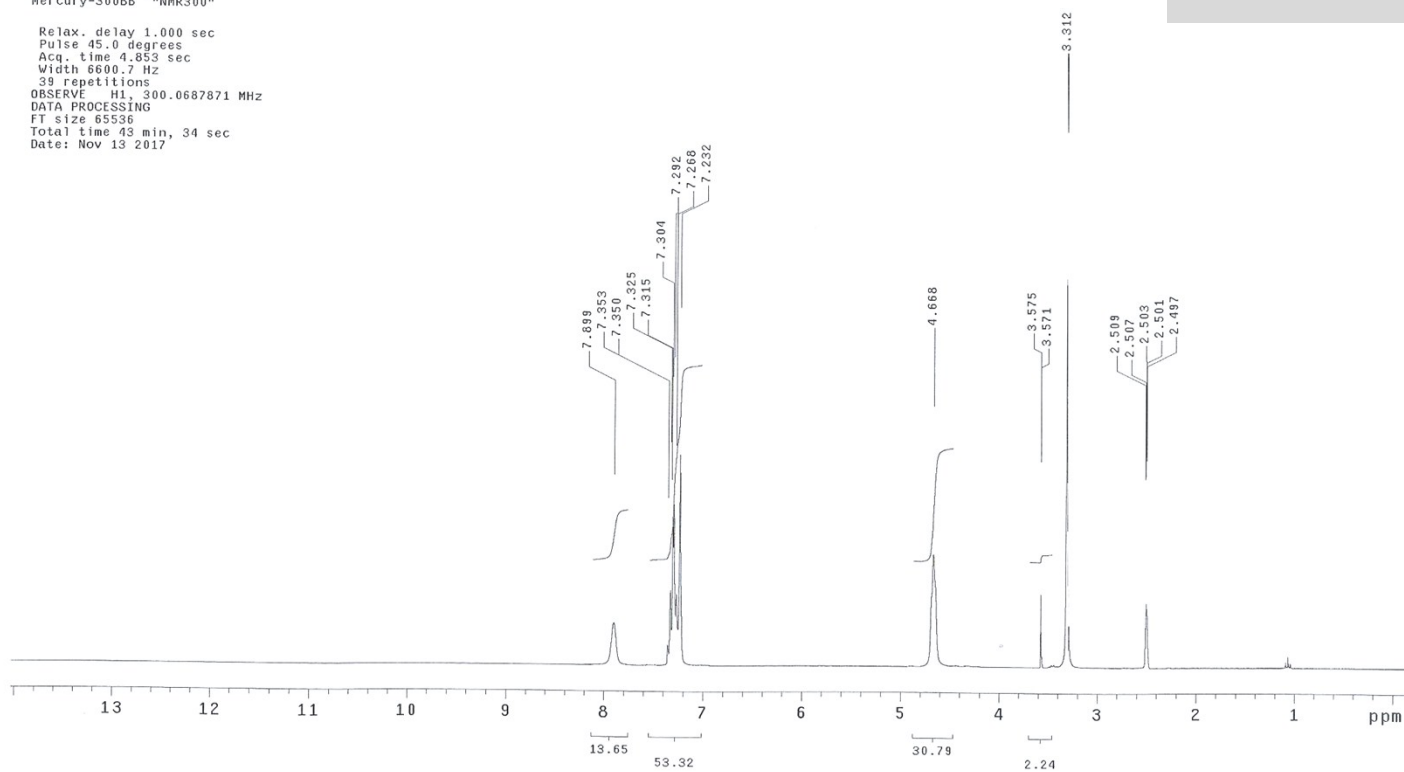

$^1\text{H}$  NMR of **3c**

WaelAbdElHameed-83P-DMSO-C13

Archive directory: /export/home/vnmr1/vnmrsys/data  
Sample directory: DD5mm\_test\_12Mar2014-21:34:40  
File: PROTON

Pulse Sequence: s2pul  
Solvent: DMSO  
Temp. 40.0 C / 313.1 K  
Mercury-300BB "NMR300"

Pulse 45.0 degrees  
Acq. time 1.815 sec  
Width 18761.7 Hz  
1088 repetitions  
OBSERVE C13, 75.4523891 MHz  
DECOUPLE H1, 300.0702830 MHz  
Power 33 dB  
continuously on  
WALTZ-16 modulated  
DATA PROCESSING  
Line broadening 1.0 Hz  
FT size 131072  
Total time 32 hr, 58 min, 37 sec  
Date: Dec 9 2017

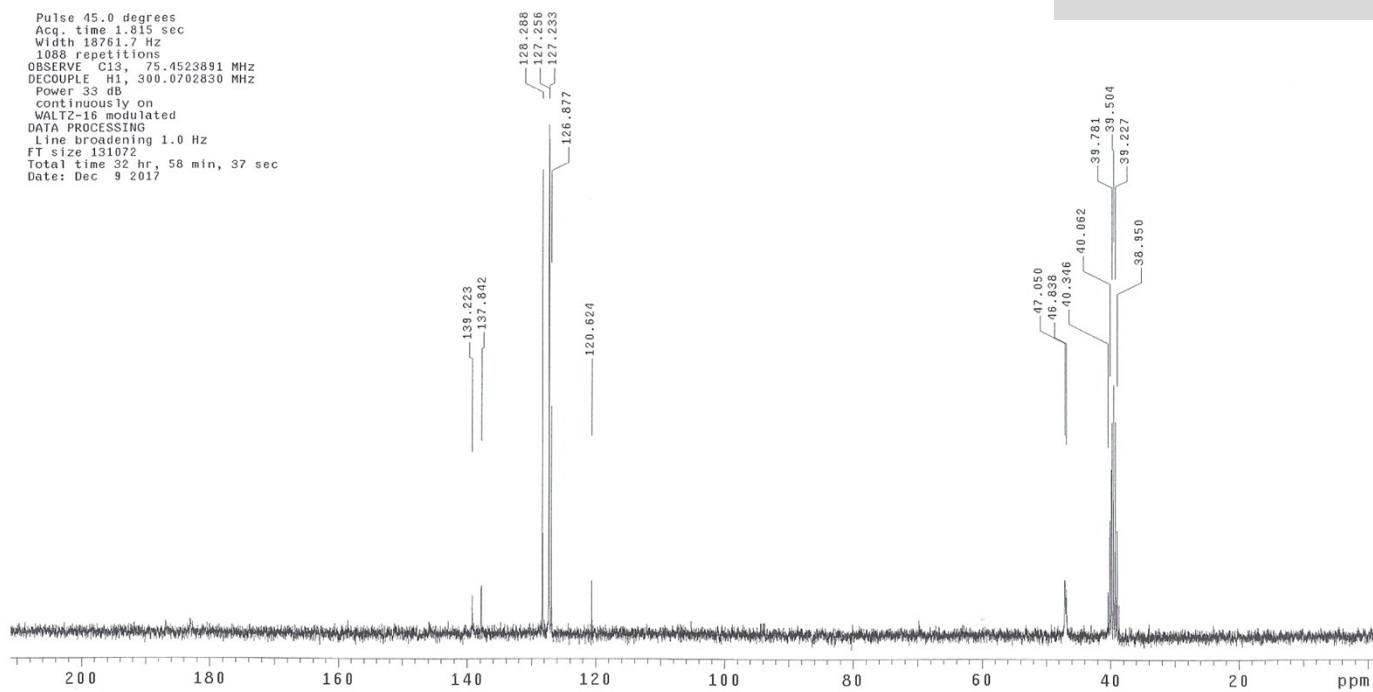

$^{13}\text{C}$  NMR of **3c**



Wae1AbdE1Hameed-84P-DMSO-H1

Archive directory: /export/home/vnmr1/vnmrsys/data  
Sample directory: DD5mm\_test\_12Mar2014-21:34:40  
File: PROTON

Pulse Sequence: s2pul  
Solvent: DMSO  
Temp. 35.0 C / 308.1 K  
Mercury-300BB "NMR300"

Relax. delay 1.000 sec  
Pulse 45.0 degrees  
Acq. time 4.853 sec  
Width 6600.7 Hz  
13 repetitions  
OBSERVE H1, 300.0687871 MHz  
DATA PROCESSING  
FT size 65536  
Total time 43 min, 34 sec  
Date: Nov 13 2017

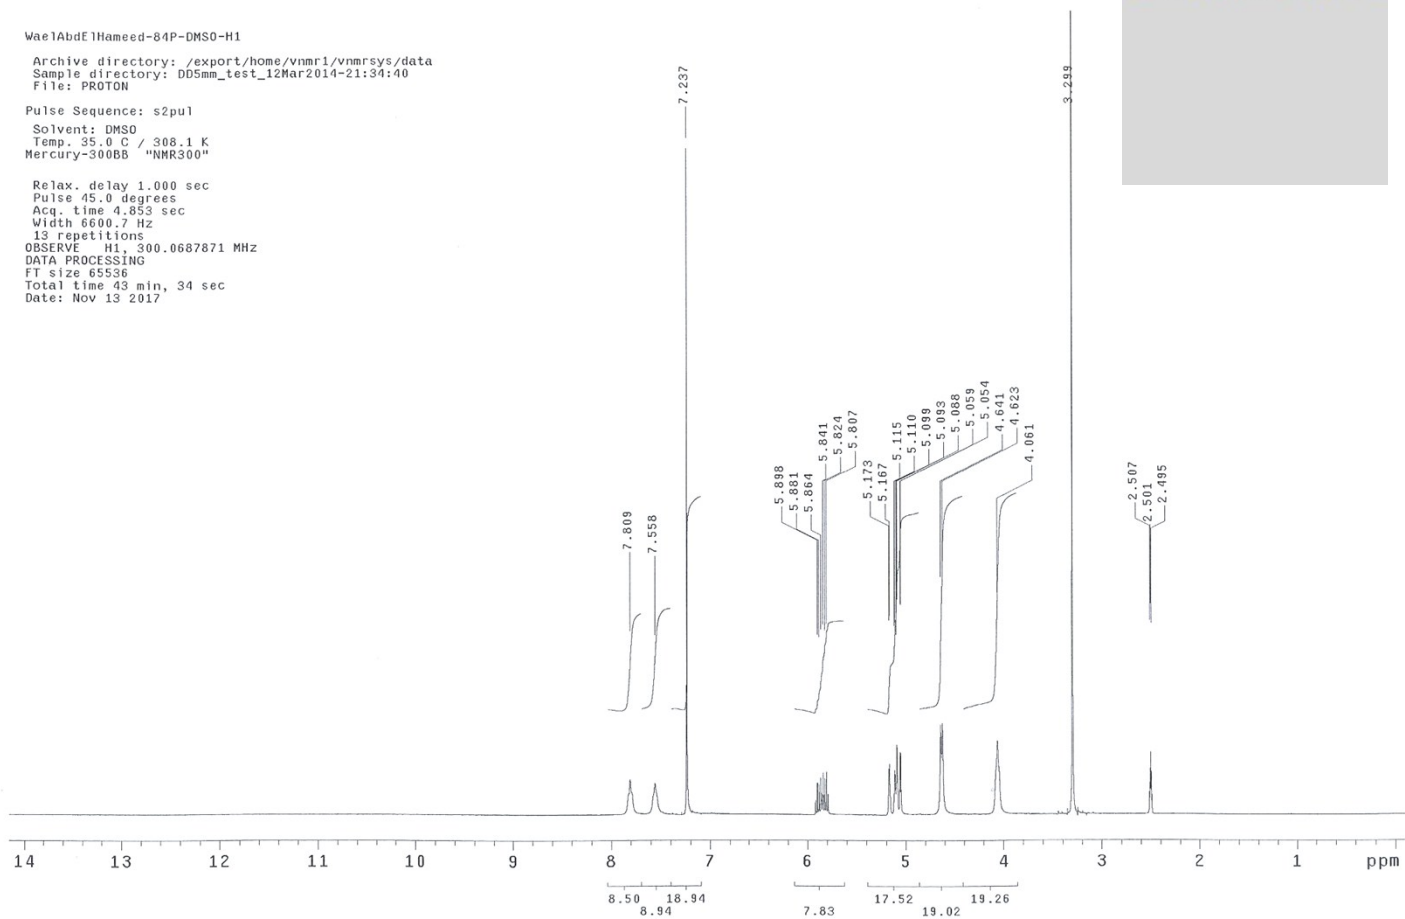

$^1\text{H}$  NMR of **3d**

WaelAbdulHameed-107P-DMSO-C13

Archive directory: /export/home/vnmr1/vnmrsys/data  
Sample directory: DD5mm\_test\_12Mar2014-21:34:40  
File: PROTON

Pulse Sequence: s2pu1  
Solvent: DMSO  
Temp. 40.0 C / 313.1 K  
Mercury-300BB "NMR300"

Pulse 45.0 degrees  
Acq. time 1.815 sec  
Width 18761.7 Hz  
1776 repetitions  
OBSERVE C13, 75.4523945 MHz  
DECOUPLE H1, 300.0702830 MHz  
Power 33 dB  
continuously on  
WALTZ-16 modulated  
DATA PROCESSING  
Line broadening 1.0 Hz  
FT size 131072  
Total time 32 hr, 58 min, 37 sec  
Date: Dec 7 2017

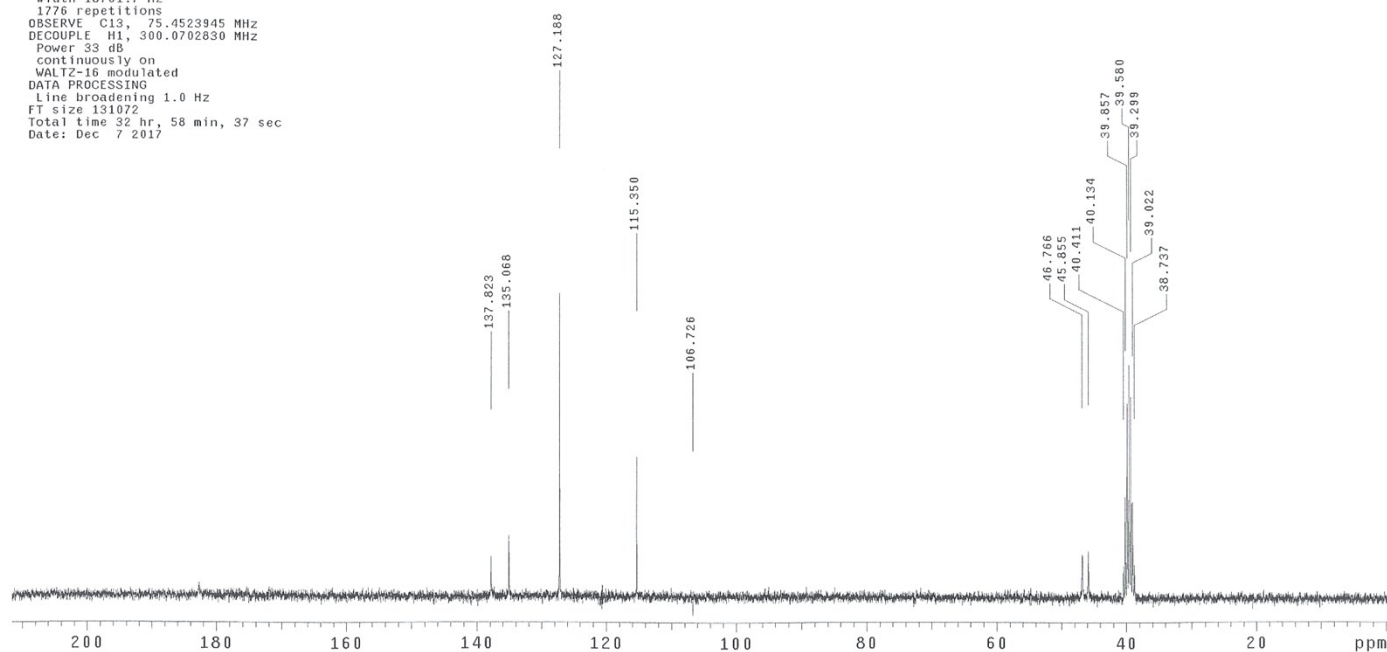

<sup>13</sup>C NMR of **3d**

Wae1AbdE1Hameed-93P-DMSO-H1

Archive directory: /export/home/vnmr1/vnmrsys/data  
Sample directory: DD5mm\_test\_12Mar2014-21:34:40  
File: PROTON

Pulse Sequence: s2pu1  
Solvent: DMSO  
Temp. 35.0 C / 308.1 K  
Mercury-300BB "NMR300"

Relax. delay 1.000 sec  
Pulse 45.0 degrees  
Acq. time 4.853 sec  
Width 6600.7 Hz  
16 repetitions  
OBSERVE H1, 300.0687871 MHz  
DATA PROCESSING  
FT size 65536  
Total time 43 min, 34 sec  
Date: Nov 13 2017

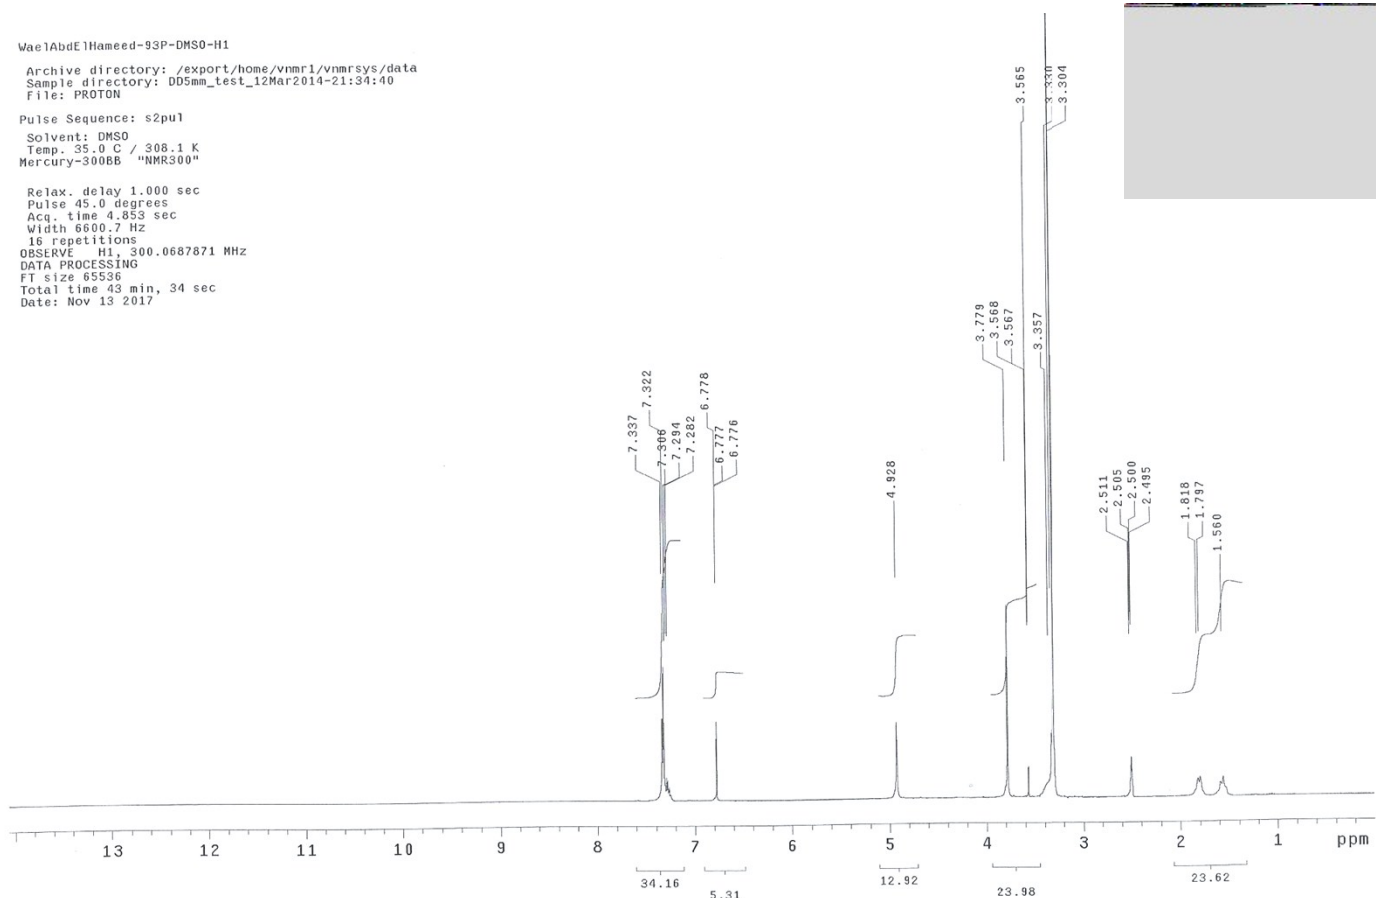

$^1\text{H}$  NMR of **5a**

Wae1AbdE1Hameed-101P-DMSO-H1

Archive directory: /export/home/vnmr1/vnmrsys/data  
Sample directory: DD5mm\_test\_12Mar2014-21:34:40  
File: PROTON

Pulse Sequence: s2pu1  
Solvent: DMSO  
Temp. 40.0 C / 313.1 K  
Mercury-300BB "NMR300"

Relax. delay 1.000 sec  
Pulse 45.0 degrees  
Acq. time 4.853 sec  
Width 6600.7 Hz  
23 repetitions  
OBSERVE H1, 300.0687871 MHz  
DATA PROCESSING  
FT size 65536  
Total time 43 min, 34 sec  
Date: Dec 9 2017

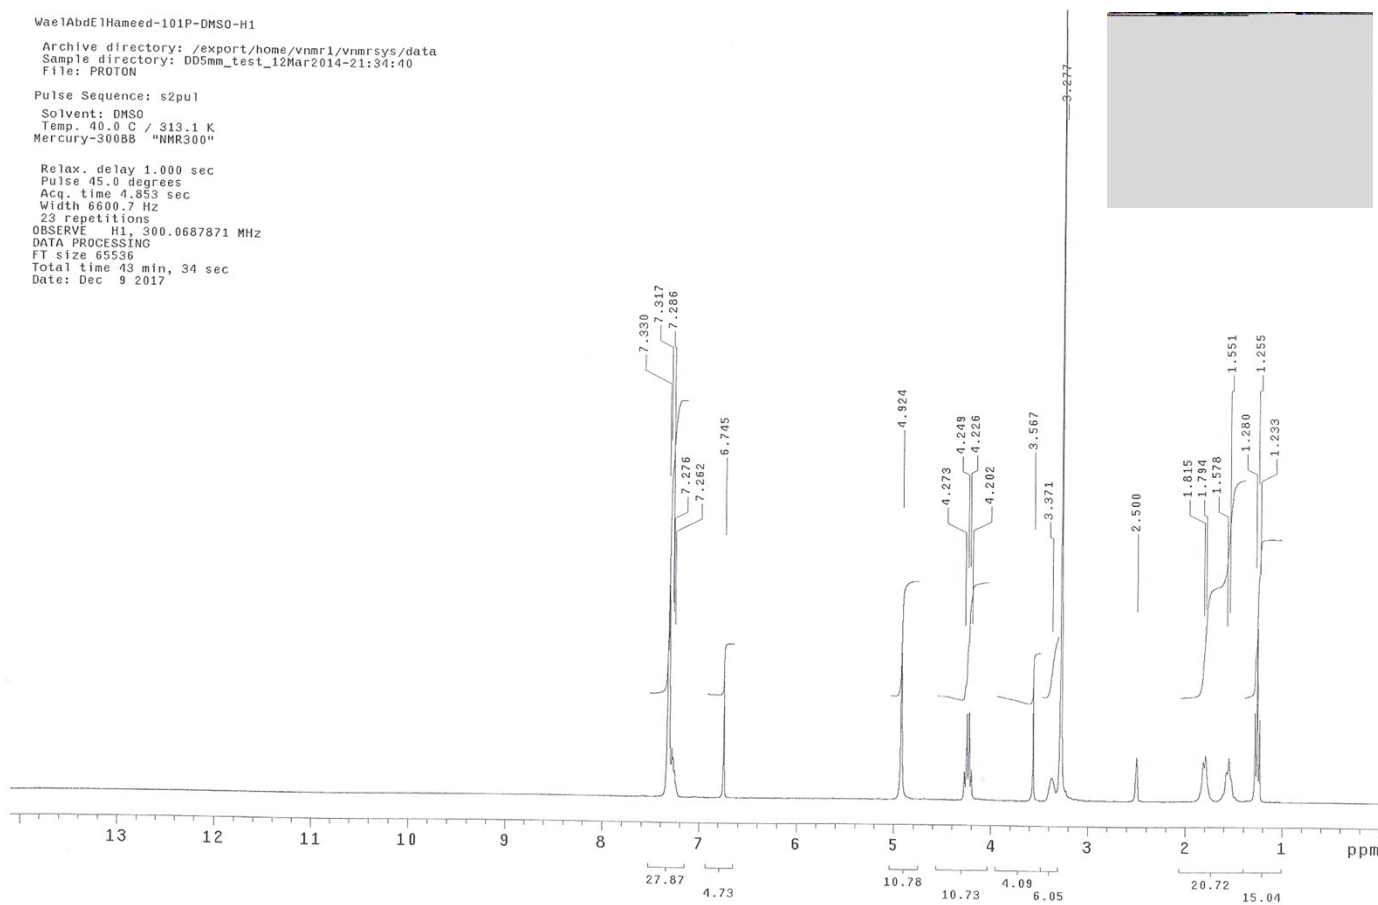

$^1\text{H}$  NMR of **5b**

Wae1AbdE1Hameed-94P-DMSO-H1

Archive directory: /export/home/vnmr1/vnmrSYS/data  
Sample directory: DD5mm\_test\_12Mar2014-21:34:40  
File: PROTON

Pulse Sequence: s2pul  
Solvent: DMSO  
Temp. 30.0 C / 303.1 K  
Mercury-300BB "NMR300"

Relax. delay 1.000 sec  
Pulse 25.0 degrees  
Acq. time 4.853 sec  
Width 6600.7 Hz  
107 repetitions  
OBSERVE H1, 300.0687871 MHz  
DATA PROCESSING  
FT size 65536  
Total time 43 min, 34 sec  
Date: Nov 12 2017

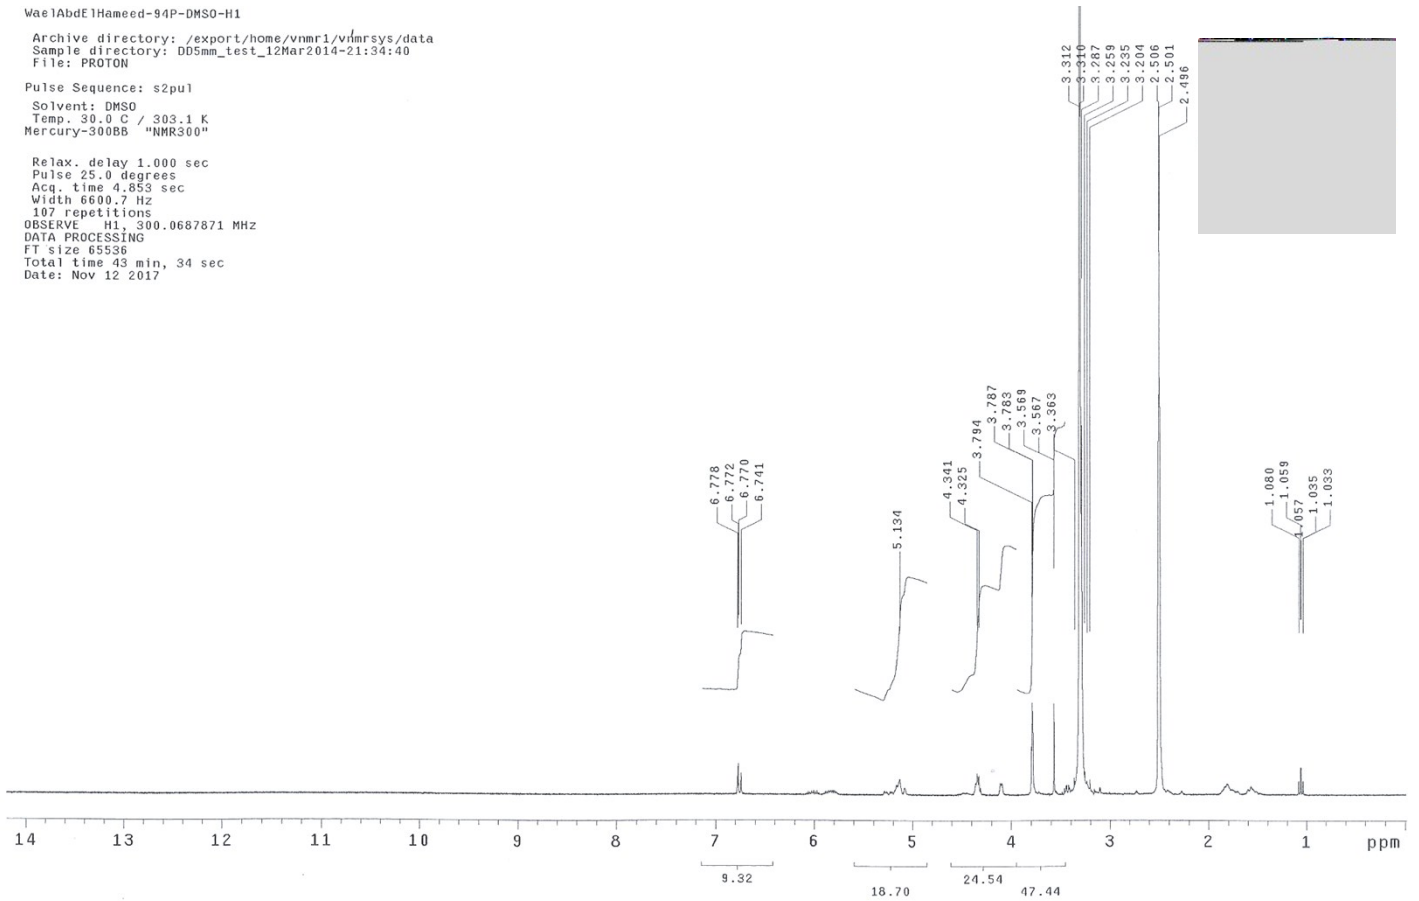

$^1\text{H}$  NMR of **5c**

Vae1AbdE1Hameed-95P-DMSO-H1

Archive directory: /export/home/vnmr1/vnmrsys/data  
Sample directory: DD5mm\_test\_12Mar2014-21:34:40  
File: PROTON

Pulse Sequence: s2pul  
Solvent: DMSO  
Temp. 35.0 C / 308.1 K  
Mercury-300BB "NMR300"

Relax. delay 1.000 sec  
Pulse 45.0 degrees  
Acq. time 4.853 sec  
Width 6600.7 Hz  
13 repetitions  
OBSERVE H1, 300.0687871 MHz  
DATA PROCESSING  
FT size 65536  
Total time 43 min, 34 sec  
Date: Nov 13 2017

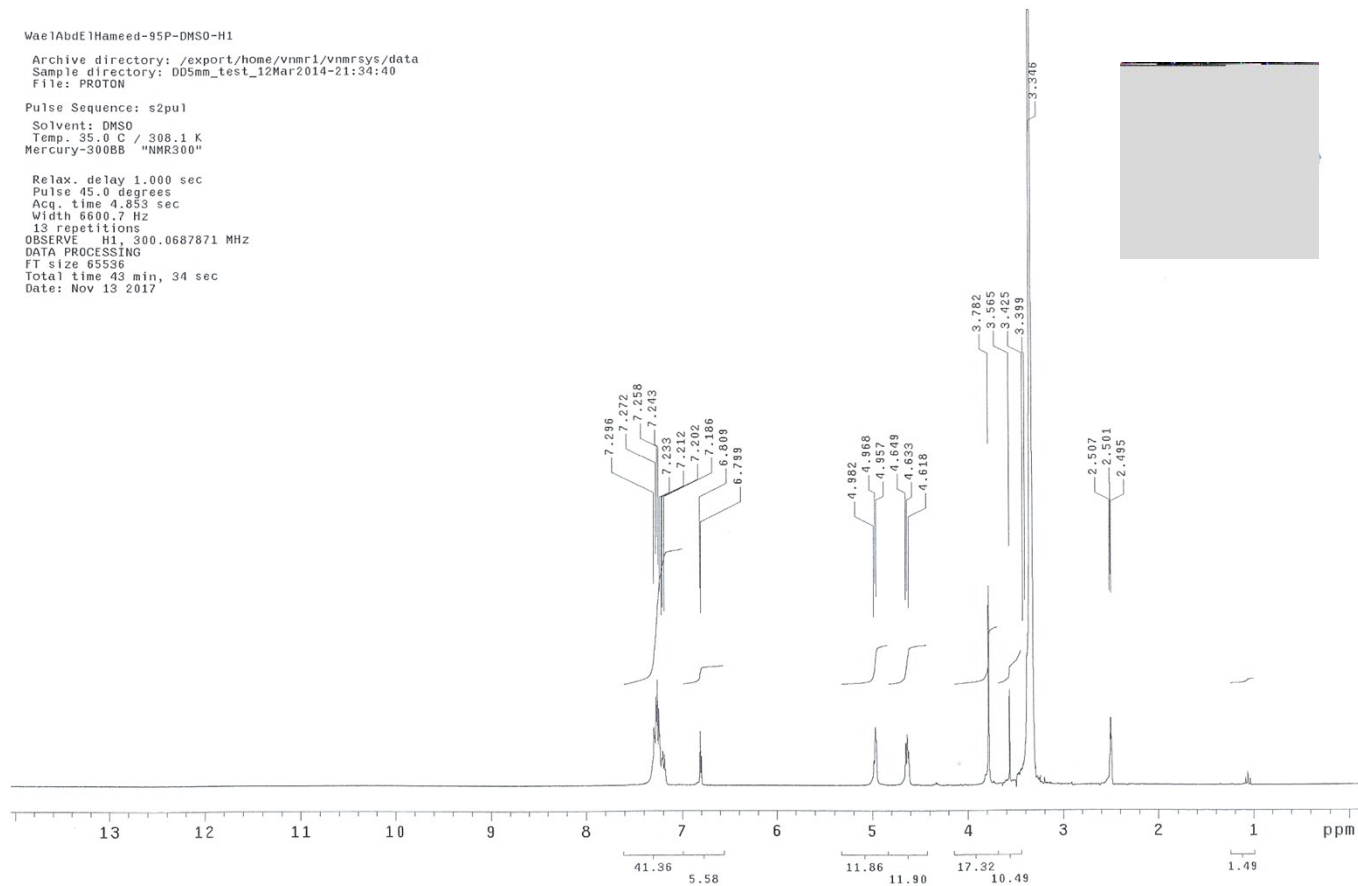

$^1\text{H}$  NMR of **6a** + **7a**

WaelAbdElHameed-103P-DMSO-H1

Archive directory: /export/home/vnmr1/vnmr/sys/data  
Sample directory: DDSmm\_test\_12Mar2014-21:34:40  
File: PROTON

Pulse Sequence: s2pu1  
Solvent: DMSO  
Temp.: 35.0 C / 308.1 K  
Mercury-300BB "NMR300"

Relax. delay 1.000 sec  
Pulse 45.0 degrees  
Acq. time 4.853 sec  
Width 6600.7 Hz  
41 repetitions  
OBSERVE H1, 300.0687871 MHz  
DATA PROCESSING  
FT size 65536  
Total time 43 min, 34 sec  
Date: Nov 13 2017

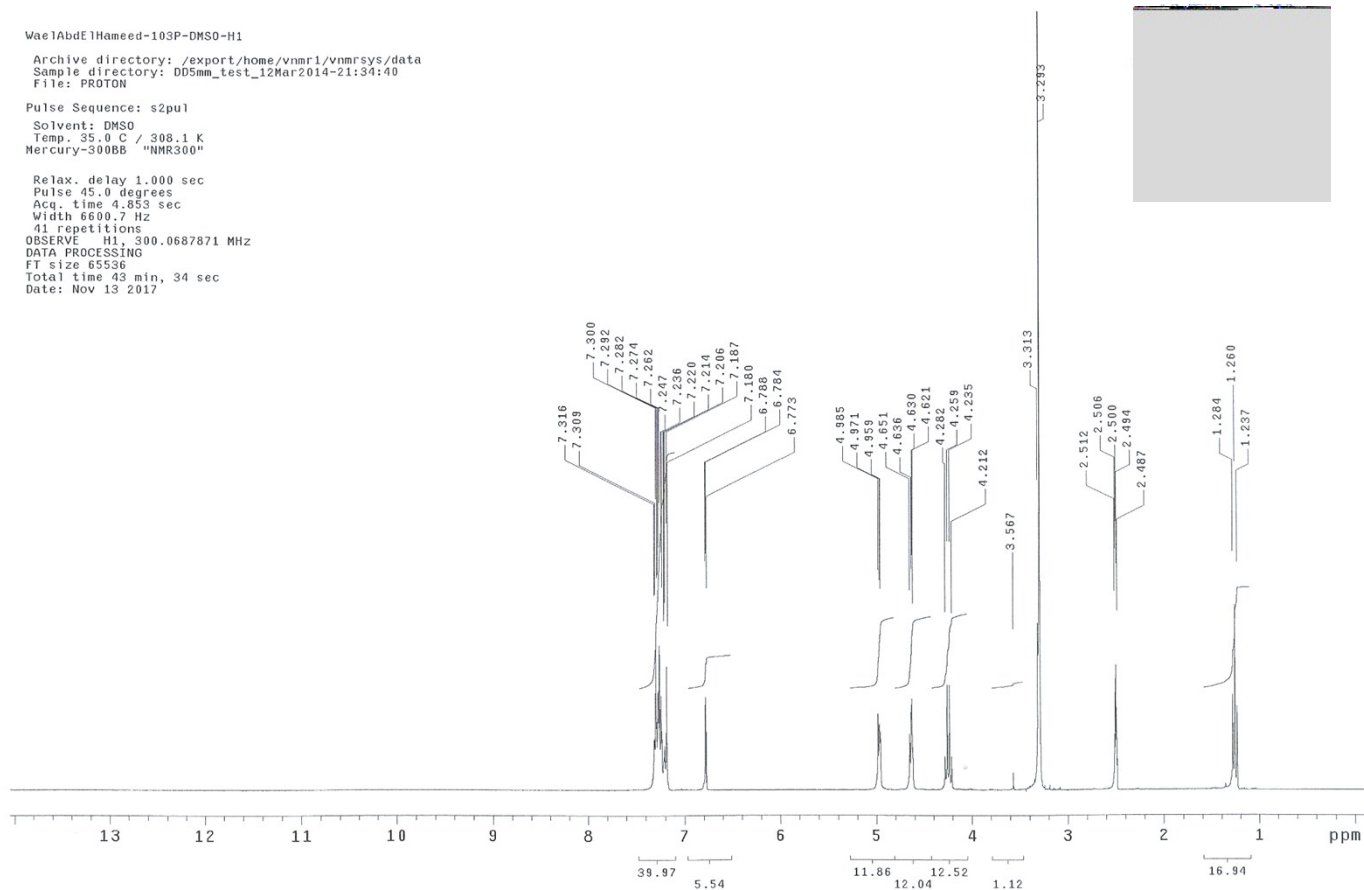

$^1\text{H}$  NMR of **6b** + **7b**

Wae1AbdE1Hameed-96P-DMSO-H1

Archive directory: /export/home/vnmr1/vnmrsys/data  
Sample directory: DD5mm\_test\_12Mar2014-21:34:40  
File: PROTON

Pulse Sequence: s2pul  
Solvent: DMSO  
Temp: 40.0 C / 313.1 K  
Mercury-300BB "NMR300"

Relax. delay 1.000 sec  
Pulse 45.0 degrees  
Acq. time 4.853 sec  
Width 6600.7 Hz  
11 repetitions  
OBSERVE H1, 300.0687871 MHz  
DATA PROCESSING  
F1 size 65536  
Total time 43 min, 34 sec  
Date: Dec 9 2017

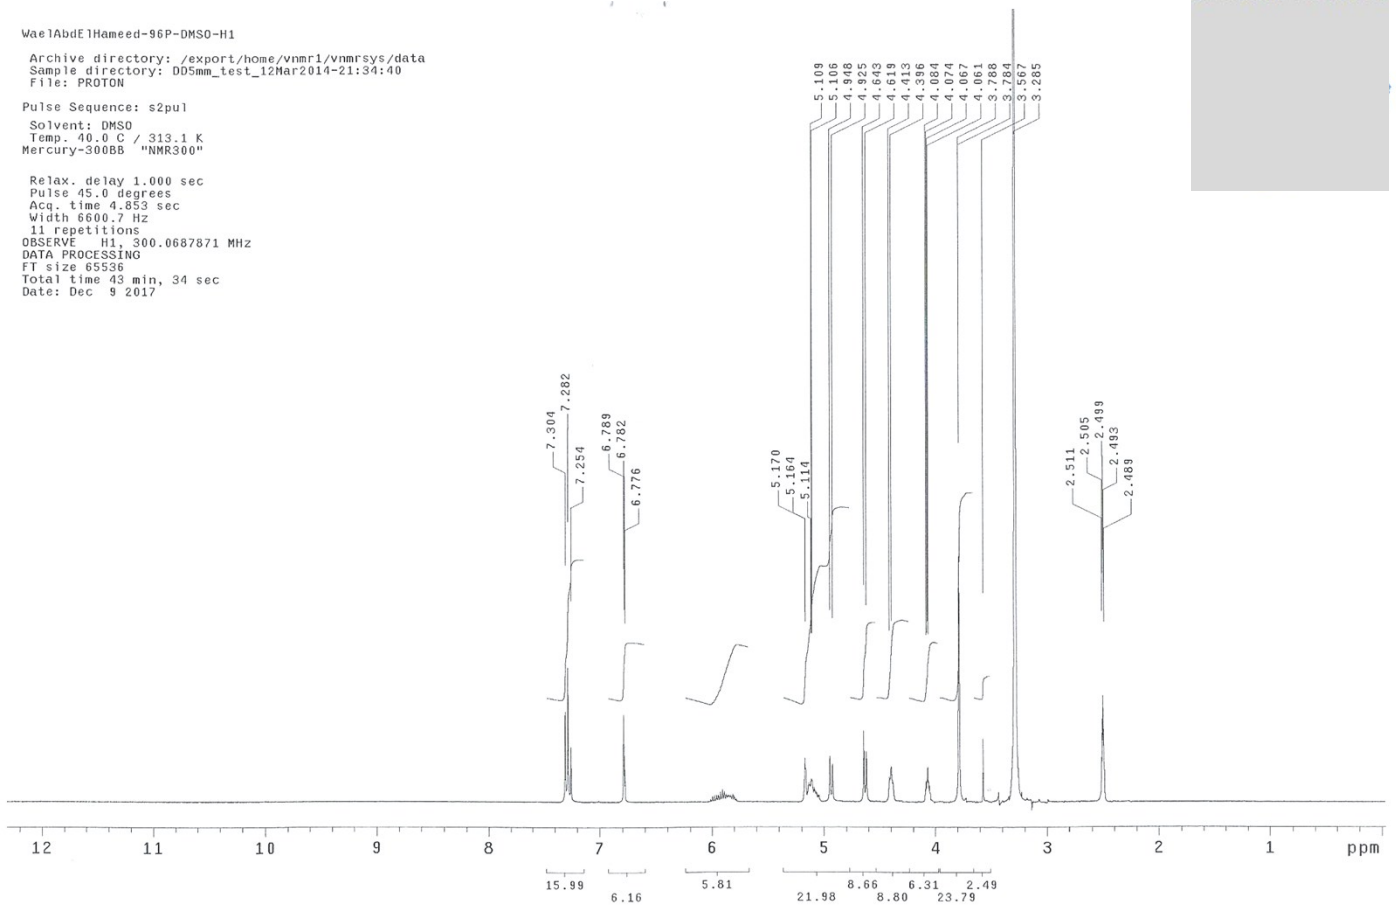

$^1\text{H}$  NMR of **6c** + **7c**



Pulse 45.0 degrees  
Acq. time 1.815 sec  
Width 18761.7 Hz  
872 repetitions  
OBSERVE C13, 75.4523891 MHz  
DECOUPLE H1, 300.0702830 MHz  
Power 33 dB  
continuously on  
WALTZ-16 modulated  
DATA PROCESSING  
Line broadening 1.0 Hz  
FT size 131072  
Total time 32 hr, 58 min, 37 sec  
Date: Dec 9 2017

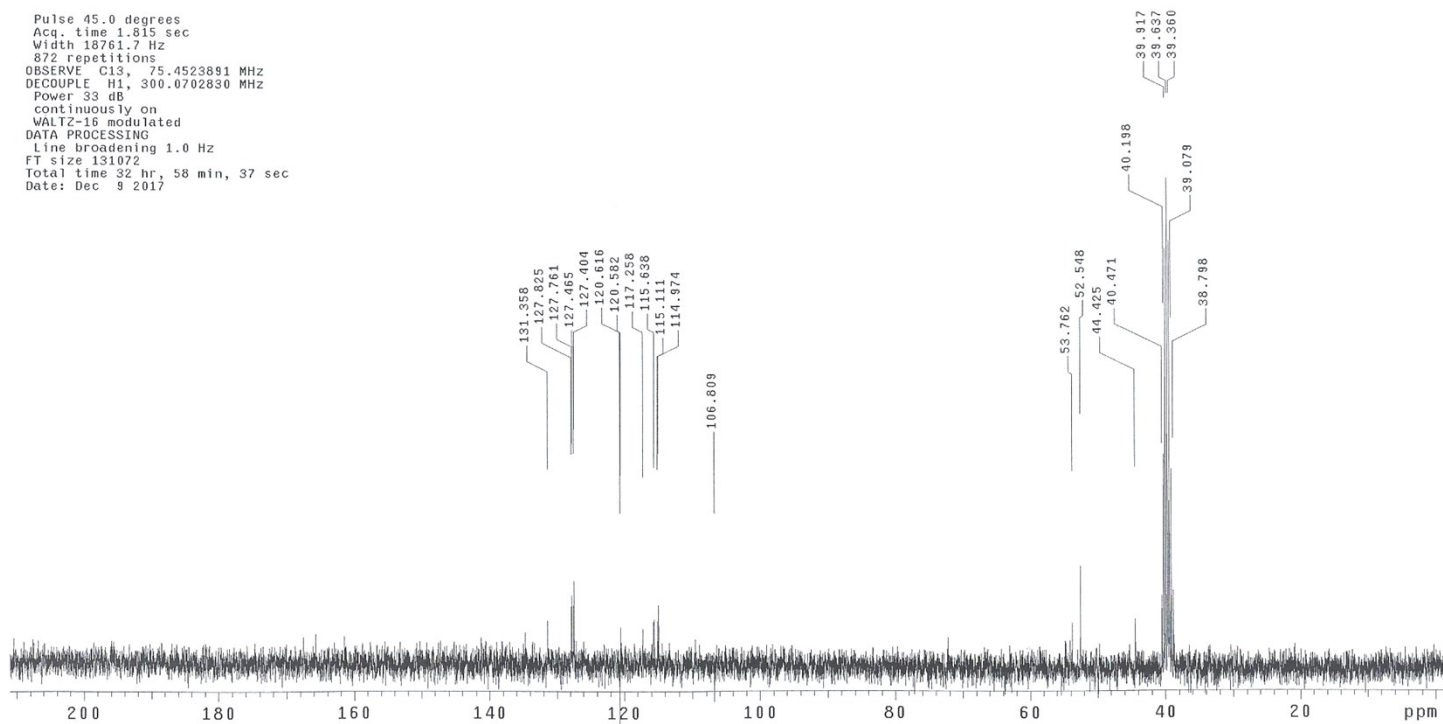

$^{13}\text{C}$  NMR of **6c** + **7c**

Wae1AbdE1Hameed-104P-DMSO-H1

Archive directory: /export/home/vnmr1/vnmrsys/data  
Sample directory: D05mm\_test\_12Mar2014-21:34:40  
File: PROTON

Pulse Sequence: s2pu1

Solvent: DMSO  
Temp. 35.0 C / 308.1 K  
Mercury-300BE "NMR300"

Relax. delay 1.000 sec  
Pulse 45.0 degrees  
Acq. time 4.853 sec  
Width 6600.7 Hz  
14 repetitions

OBSERVE H1, 300.0687871 MHz  
DATA PROCESSING  
FT size 65536  
Total time 43 min, 34 sec  
Date: Nov 13 2017

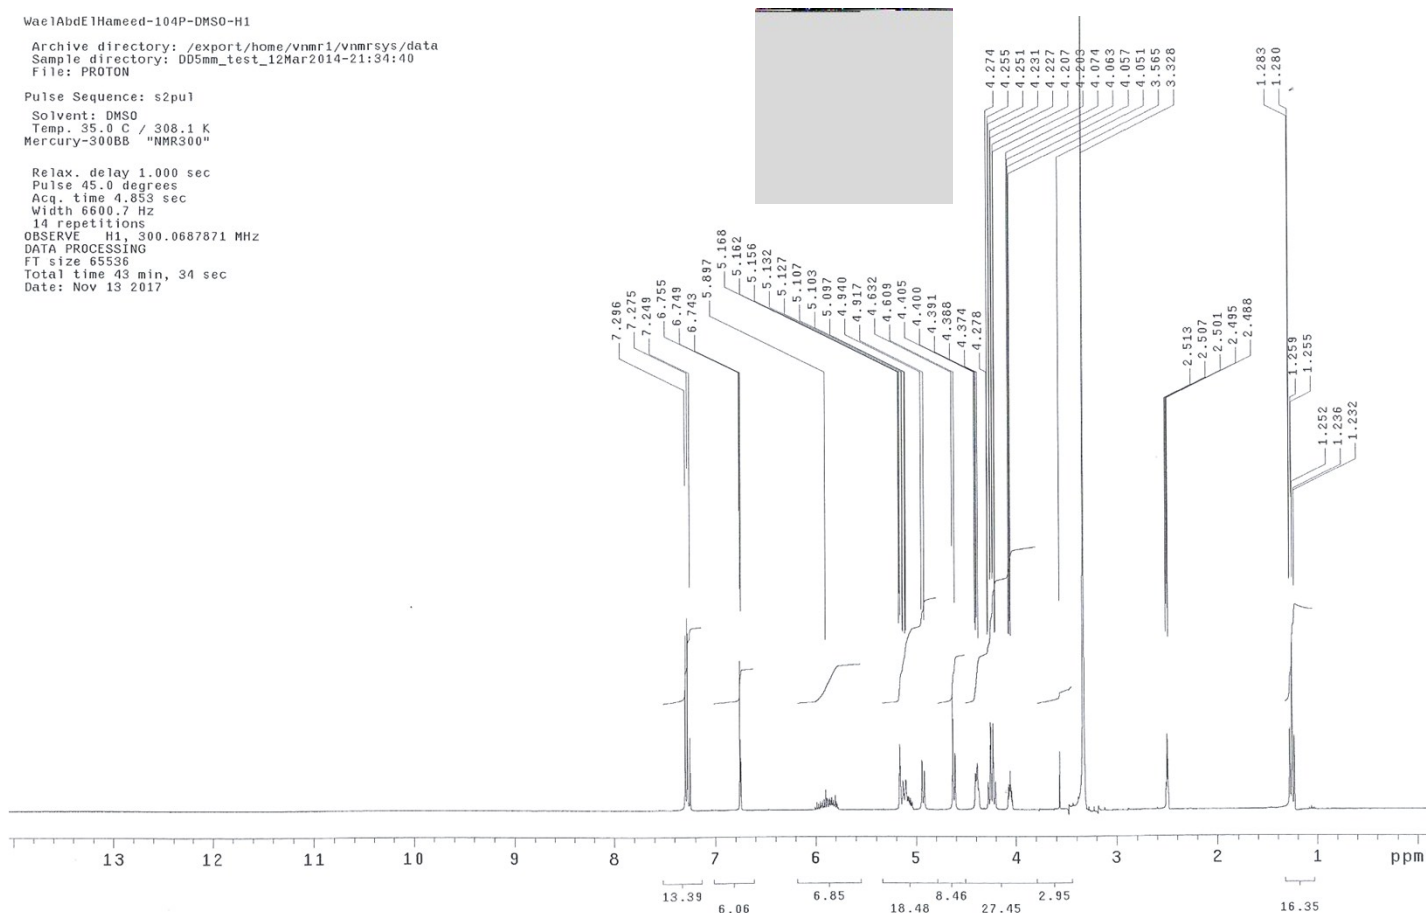

$^1\text{H}$  NMR of 6d + 7d

Vae1AbdElHameed-90P-DMSO-H1

Archive directory: /export/home/vnmr1/vnmrsys/data  
Sample directory: D05mm\_test\_12Mar2014-21:34:40  
File: PROTON

Pulse Sequence: s2pu1  
Solvent: DMSO  
Temp. 35.0 C / 308.1 K  
Mercury-300BB "NMR300"

Relax. delay 1.000 sec  
Pulse 45.0 degrees  
Acq. time 4.853 sec  
Width 6600.7 Hz  
20 repetitions  
OBSERVE H1, 300.0687871 MHz  
DATA PROCESSING  
FT size 65536  
Total time 43 min, 34 sec  
Date: Nov 13 2017

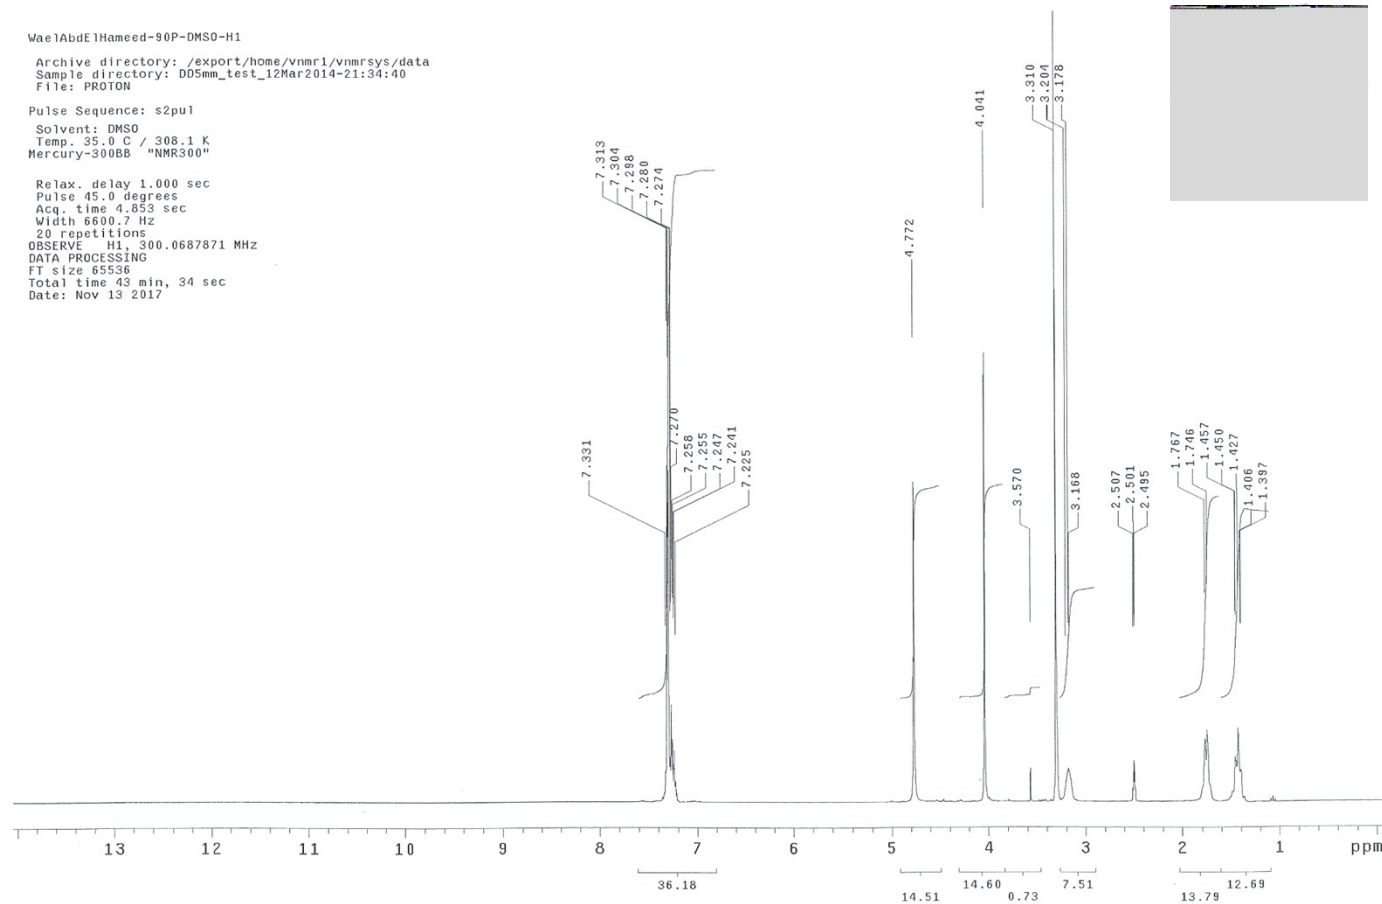

$^1\text{H}$  NMR of **8a**

Wae1AbdE1Hameed-91P-DMSO-H1

Archive directory: /export/home/vnmr1/vnmrSYS/data  
Sample directory: DD5mm\_test\_12Mar2014-21:34:40  
File: PROTON

Pulse Sequence: s2pu1  
Solvent: DMSO  
Temp. 35.0 C / 308.1 K  
Mercury-300BB "NMR300"

Relax. delay 1.000 sec  
Pulse 45.0 degrees  
Acq. time 4.853 sec  
Width 6600.7 Hz  
59 repetitions  
OBSERVE H1, 300.0687871 MHz  
DATA PROCESSING  
FT size 65536  
Total time 43 min, 34 sec  
Date: Nov 13 2017

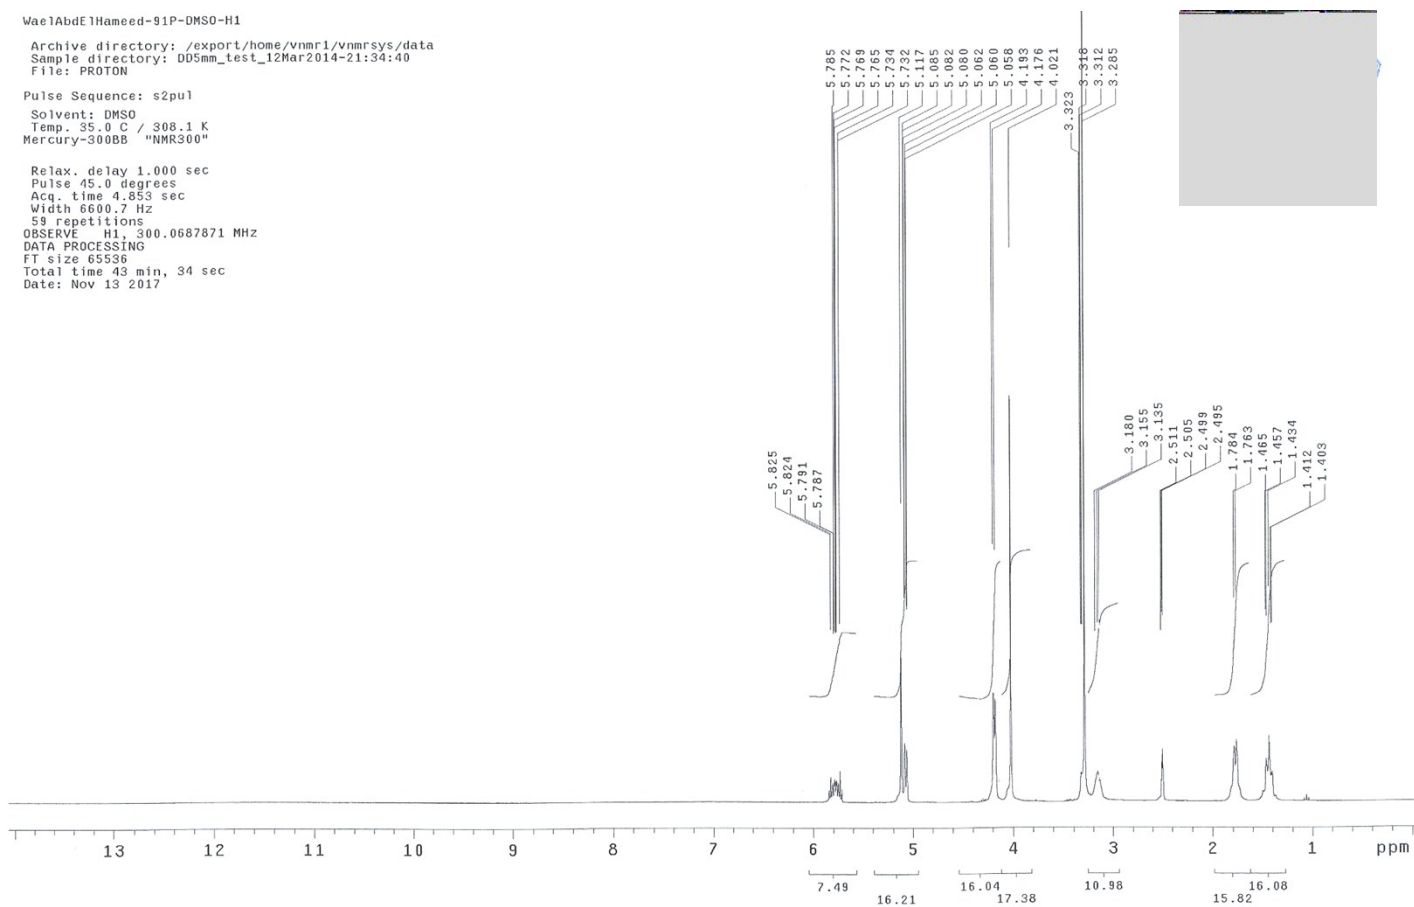

$^1\text{H}$  NMR of **8b**

Wae1AbdElHameed-89P-DMSO-H1

Archive directory: /export/home/vnmr1/vnmrsys/data  
Sample directory: DD5mm\_test\_12Mar2014-21:34:40  
File: PROTON

Pulse Sequence: s2pu1  
Solvent: DMSO  
Temp: 35.0 C / 308.1 K  
Mercury-300BB "NMR300"

Relax. delay 1.000 sec  
Pulse 45.0 degrees  
Acq. time 4.853 sec  
Width 6600.7 Hz  
10 repetitions  
OBSERVE H1, 300.0687871 MHz  
DATA PROCESSING  
FT size 65536  
Total time 43 min, 34 sec  
Date: Nov 13 2017

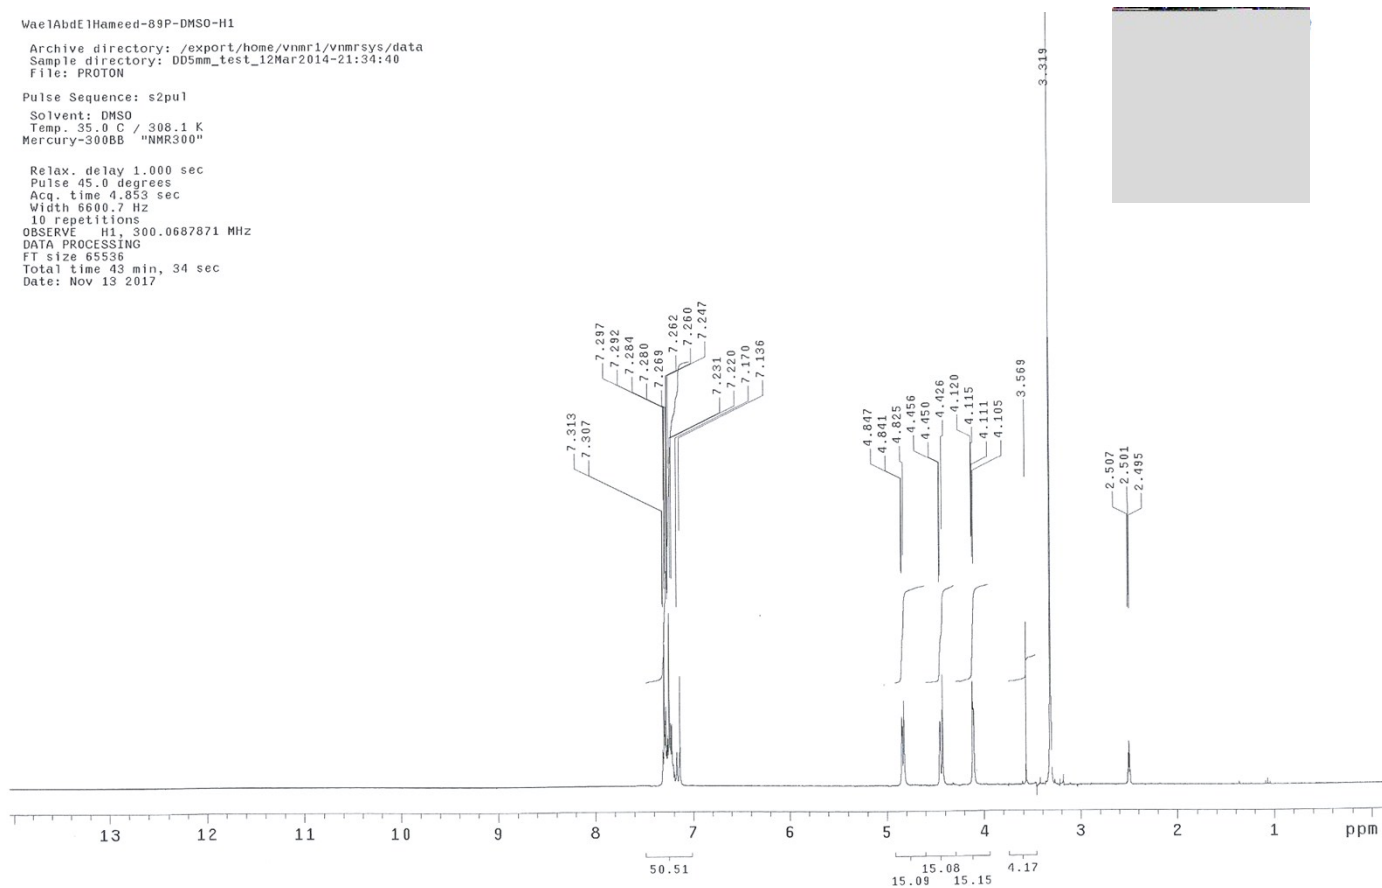

$^1\text{H}$  NMR of **9a** + **10a**

WaeIAbdtIHameed-92P-DMSO-H1

Archive directory: /export/home/vnmr1/vnmrsys/data  
Sample directory: DD5mm\_test\_12Mar2014-21:34:40  
File: PROTON

Pulse Sequence: s2pu1  
Solvent: DMSO  
Temp: 40.0 C / 313.1 K  
Mercury-300BB "NMR300"

Relax. delay 1.000 sec  
Pulse 45.0 degrees  
Acq. time 4.853 sec  
Width 6600.7 Hz  
13 repetitions  
OBSERVE H1, 300.0687871 MHz  
DATA PROCESSING  
FT size 65536  
Total time 43 min, 34 sec  
Date: Dec 9 2017

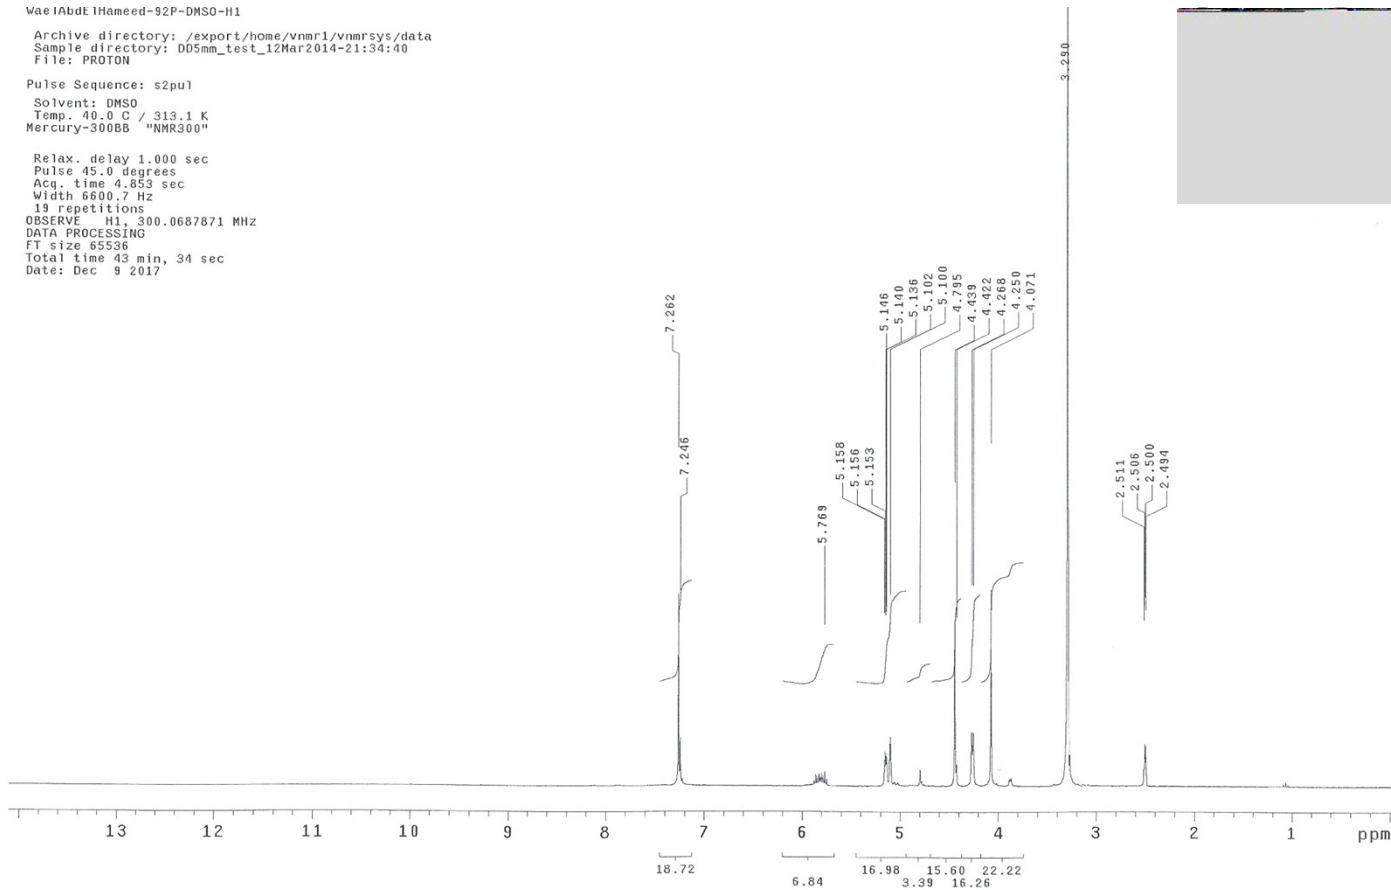

$^1\text{H}$  NMR of **9b** + **10b**

Pulse Sequence: s2pu1  
Solvent: DMSO  
Temp. 40.0 C / 313.1 K  
Mercury-300BB "NMR500"

Pulse 45.0 degrees  
Acq. time 1.815 sec  
Width 18761.7 Hz  
1840 repetitions  
OBSERVE C13, 75.4524000 MHz  
DECOUPLE H1, 300.0702830 MHz  
Power 33 dB  
continuously on  
WALTZ-16 modulated  
DATA PROCESSING  
Line broadening 1.0 Hz  
FT size 131072  
Total time 32 hr, 58 min, 37 sec  
Date: Dec 9 2017

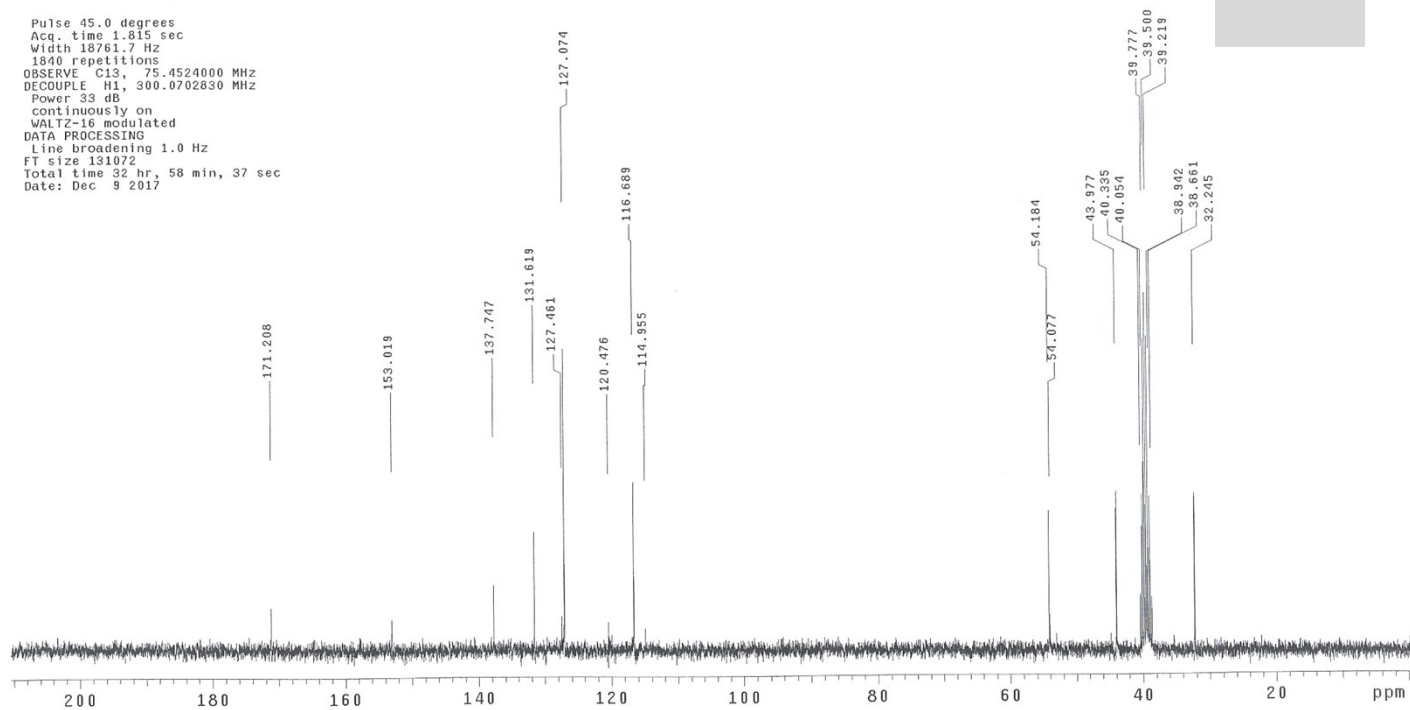

$^{13}\text{C}$  NMR of **9b** + **10b**

### Green Metrics Calculations<sup>1,2</sup>

$$\% \text{ Atomic Efficiency (AE)} = \frac{\text{Mol Wt. of desired product}}{\text{Mol Wt. of all reagents}} \times 100$$

$$\% \text{ Carbon Efficiency (CE)} = \frac{\text{Mass of carbon in product}}{\text{Total mass of carbon in the reactants}} \times 100$$

$$\text{Reaction Mass Efficiency (RME)} = \frac{\text{Mass of the isolated product}}{\text{Total mass of reactants used in the reaction}} \times 100$$

$$\text{E-Factor (EF)} = \frac{\text{Mass of the total waste}}{\text{Mass of the crude product}}$$

$$\text{Process Mass Intensity (PMI)} = \frac{\text{Total mass used in process}}{\text{Mass of product}}$$

### References

1. D. Curzons, D. J. C. Constable, D. N. Mortimer and V. L. Cunningham, *Green Chem.*, 2001, **3**, 1-6.
2. C. Jimenez-Gonzalez, D. J. C. Constable and C. S. Ponder, *Chem. Soc. Rev.*, 2012, **41**, 1485-1498.
